# 1 **Host-microbiome protein-protein interactions reveal mechanisms** 2 **in human disease**

3  
4 **Authors:** Hao Zhou<sup>1†</sup>, Juan Felipe Beltrán<sup>1†</sup>, Ilana Lauren Brito<sup>1\*</sup>

## 5 **Affiliations**

6 <sup>1</sup> Meinig School of Biomedical Engineering, Cornell University, Ithaca, NY

7 <sup>†</sup>These authors contributed equally to this work.

8 <sup>\*</sup>Corresponding author. Email: Ilana L. Brito (ibrito@cornell.edu)

## 9 10 **Abstract**

11 Host-microbe interactions are crucial for normal physiological and immune system development and are  
12 implicated in a wide variety of diseases, including inflammatory bowel disease (IBD), colorectal cancer  
13 (CRC), obesity, and type 2 diabetes (T2D). Despite large-scale case-control studies aimed at identifying  
14 microbial taxa or specific genes involved in pathogenesis, the mechanisms linking them to disease have  
15 thus far remained elusive. To identify potential mechanisms through which human-associated bacteria  
16 impact host health, we leveraged publicly-available interspecies protein-protein interaction (PPI) data to  
17 find clusters of microbiome-derived proteins with high sequence identity to known human protein  
18 interactors. We observe differential targeting of putative human-interacting bacterial genes in  
19 metagenomic case-control microbiome studies. In nine independent case studies, we find evidence that  
20 the microbiome broadly targets human proteins involved in immune, oncogenic, apoptotic, and endocrine  
21 signaling pathways in relation to IBD, CRC, obesity and T2D diagnoses. This host-centric analysis  
22 strategy provides a mechanistic hypothesis-generating platform for any metagenomics cohort study and  
23 extensively adds human functional annotation to commensal bacterial proteins.

## 24 25 **One-sentence summary**

26 Microbiome-derived proteins are linked to disease-associated human pathways by metagenomic and  
27 protein-protein interaction analyses.

## 28 Main Text

29 Metagenomic case-control studies of the human gut microbiome have implicated bacterial genes in a  
30 myriad of diseases. Yet, the sheer diversity of genes within the microbiome (Li et al., 2014) and the  
31 limitations of functional annotations (Joice et al., 2014) have thwarted efforts to identify the mechanisms  
32 by which bacterial genes impact host health. In the cases where functional annotations exist, they tend to  
33 reflect the proteins' most granular molecular functions (*e.g.* DNA binding, post-translational  
34 modification) rather than their role in biological pathways (Lloyd-Price et al., 2017) and few, if any, relate  
35 to host cell signaling and homeostasis. Associating any commensal bacterial gene and a host pathway has  
36 thus far required experimental approaches catered to each gene or gene function (Nešić et al., 2014;  
37 Plovier et al., 2017).

38 Protein-protein interactions (PPIs) have revealed the mechanisms by which pathogens interact with host  
39 tissue through in-depth structural studies of individual proteins (Guyen-Maiorov et al., 2017a; Hamiaux et  
40 al., 2006; Nešić et al., 2014), as well as large-scale whole-organism interaction screens (Dyer et al., 2010;  
41 Shah et al., 2018). These interactions are not limited to pathogens as many canonical protein-mediated  
42 microbe-associated molecular patterns (MAMPs) that directly trigger host-signaling pathways through  
43 pattern recognition receptors present on epithelial and immune tissues (Bhavsar et al., 2007) are  
44 conserved between pathogens and commensals (Lebeer et al., 2010), such as that between flagellin with  
45 Toll-like receptor 5 (TLR5). There is a growing recognition of the role for commensal-host PPIs in health  
46 (Table 1, Table S1): the *Akkermansia muciniphila* protein p9 binds intercellular adhesion molecule 2  
47 (ICAM2) to increase thermogenesis and glucagon-like peptide-1 (GLP-1) secretion, a therapeutic target  
48 for type 2 diabetes (T2D) (LeValley et al., 2020); the protein Fap2 from *Fusobacterium nucleatum* binds  
49 T cell immunoreceptor with Ig and ITIM domains (TIGIT), inhibiting natural killer cytotoxicity; and a  
50 slew of ubiquitin mimics encoded by both pathogens (Guyen-Maiorov et al., 2017b) and gut commensals  
51 (Stewart et al., 2018) play a role in modulating membrane trafficking. Whereas these efforts have  
52 progressed on a one-by-one basis, we hypothesized that host-microbiome PPIs that underlie health status  
53 may be widespread and that a systems-level approach could serve to provide additional information,  
54 through annotation of human pathways, about the role of bacteria in modulating health.

55 Currently, few experimentally-verified inter-species PPIs exist involving human proteins, totaling 15,252  
56 unique interactions in IntAct (Orchard et al., 2014), BioGRID (Oughtred et al., 2019), HPIdb (Ammari et  
57 al., 2016) and a set of manually curated PPI datasets (Fig. S1). Only a handful of these involve proteins  
58 pulled from the human gut microbiome. Expanding the commensal-human interaction network through  
59 state-of-the-art structural modeling (Guyen-Maiorov et al., 2019) is untenable, as there are few sequences  
60 homologous to genes found in metagenomes represented in cocrystals from the Protein Data Bank  
61 (Burley et al., 2017) (PDB) (Fig. S2). In the absence of structure and experimental data, sequence identity  
62 methods have been used to great effect to infer host-pathogen PPI networks for single pathogens (Eid et  
63 al., 2016; Huo et al., 2015; Sen et al., 2016), but such approaches have not yet been applied at the  
64 community-level, as would be required for the human gut microbiome. Concerned over the reliability of  
65 interactions, we posited that we could leverage metagenomic case-control studies to hone in on those  
66 interactions relevant to disease, by focusing only on those interactions relevant to disease by virtue of  
67 their putative interactions with human proteins.

### 68 Mapping microbiome proteins to known PPIs identifies potential mechanistic links to disease

69 All pathogen-host interactions are initially implicated in virulence, whereas microbiome-associated  
70 disorders tend not to follow Koch's postulates (Byrd and Segre, 2016). To distinguish PPIs that may be  
71 associated with health versus disease, we compared community-level PPI profiles in large case-control  
72 cohorts of well-established microbiome-associated disorders—namely inflammatory bowel disease (IBD)  
73 (Franzosa et al., 2019; Schirmer et al., 2018), colorectal cancer (CRC) (Feng et al., 2015; Hannigan et al.,  
74 2018; Yu et al., 2017; Zeller et al., 2014), obesity (Le Chatelier et al., 2013), and T2D (Karlsson et al.,  
75 2013; Qin et al., 2012) (Fig. 1A, Table S2). In order to build community-level PPI profiles, we associated

76 gene family abundances in these nine studies to a newly constructed database of bacterial human-protein  
77 interactors and the bacterial members of their associated UniRef clusters (Fig. S1), which represent  
78 homeomorphic protein superfamilies through sequence identity (Wu et al., 2004). For further assurance,  
79 we required microbiome proteins to have high amino-acid similarity (at least 70%) with the specific  
80 proteins with experimental evidence of interacting with human proteins. We noticed that proteins present  
81 exclusively in pathogenic organisms, such as the *Clostridium difficile* toxin B (TcdB) which binds  
82 frizzled 2 (FZD2), or expressed predominantly by pathogenic isolates, such as *Fingoldia magna* protein  
83 L, which binds immunoglobulin L chains, are consequently filtered out (Åkerström and Björck, 2009).  
84 We found that interspecies bacterial-human protein interface residues, in general, are highly similar, or  
85 even identical, between members of the same UniRef cluster filtered in the same manner (Fig. S3).  
86 Focusing on putative microbiome interactors with strong associations with disease weeds out a greater  
87 percent of interactions initially detected by yeast-2-hybrid (Y2H) methods and enriches for those that are  
88 based on affinity techniques (Fig. S4), and consequently removes the most “sticky” bacterial proteins  
89 (Fig. S5). The human protein with the highest degree remaining is nuclear factor NF- $\kappa$ B p105 subunit  
90 (NFKB1), a protein involved in immunodeficiency and bacterial infection, which was differentially  
91 targeted in CRC (in Vogtmann et al.). After applying a random forest classifier trained on each disease  
92 cohort (Fig. S6), we find 1,102 commensal bacterial protein clusters associated with disease, by virtue of  
93 their putative interactions with 648 human proteins (Table S3).

94 Surprisingly, within the human proteins associated with CRC via the microbiome are a number of  
95 previously identified CRC-associated genetic loci (e.g. immunoglobulin 8 (IL-8), toll-like receptor 2  
96 (TLR2), selenoprotein P, the phospholipid scramblase 1, MDM4, and the histone acetyltransferase p300,  
97 among others. This represents a larger trend: moving from the 5,770 human proteins within the  
98 interaction network (‘HBNet’), to the 2,279 human proteins with bacterial interactors detected in human  
99 microbiomes (‘Detected’), to the 648 that are associated with disease (‘Disease-associated’), we observe  
100 increasing enrichment for proteins with previously-reported gene-disease associations (GDA) in CRC,  
101 diabetes, obesity, and IBD (Fig. 1B). These enrichments are even more pronounced when examining each  
102 specific disease cohort (Fig. S7). However, we see enrichment for microbiome-associated disorders in  
103 each of the cohorts, reflecting their associated relative risks (Jess et al., 2019; Jurjus et al., 2016; Kang et  
104 al., 2019; de Kort et al., 2017; Stidham and Higgins, 2018). In fact, out of all of the proteins with any  
105 GDA in the disease-associated set, 45.2% percent have more than one GDA for our diseases of interest.  
106 We suspected this may extend to autoimmune diseases, which are increasingly studied in the context of  
107 the gut microbiome (Gianhecchi and Fierabracci, 2019), and we confirm enrichment of GDAs for  
108 autoimmune disorders in the human proteins implicated by our method (Fig. 1B, Fig. S7). This  
109 concordance between known disease annotation and disease association demonstrates the utility of using  
110 PPIs to capture molecular heterogeneity that underlies microbiome-related disease.

111 In evaluating the statistical significance of recurrent human functional annotations, we performed  
112 pathway enrichment analysis on the implicated human proteins and find proteins with established roles in  
113 cellular pathways coherent with the pathophysiology of IBD, CRC, obesity and T2D (Fig. 1C), namely  
114 those involving immune system, apoptosis, oncogenesis, and endocrine signaling pathways. Most  
115 enriched pathways include human proteins across the four types of disease cohorts analyzed, reflecting  
116 their associated relative risks (Jess et al., 2019; Jurjus et al., 2016; Kang et al., 2019; de Kort et al., 2017;  
117 Stidham and Higgins, 2018). Human proteins differentially targeted by microbiome-sourced proteins have  
118 roles in pathways involved in bacterial pathogenesis and underlying inflammation, such as the IL-12  
119 signaling pathway and clathrin-mediated endocytosis signaling. These pathways were expected due to  
120 shared evolutionary histories between the screened pathogens and gut microbiota and opportunism within  
121 the microbiome. The involvement in the clathrin-mediated endocytosis pathways (Fig. 1D) further hints at  
122 how commensal proteins may enter human cells. Pathways related to bile salt metabolism and cholesterol  
123 metabolism (LXR/RXR, TX/RXR and FXR/RXR activation pathways), which are also tied to immune

124 evasion (Alatshan and Benkő, 2021; Valledor et al., 2004) are also enriched, expanding the role of the  
125 microbiota in these pathways beyond their enzymatic functions.

126 Within these pathways, we see specific examples of known molecular mechanisms for these diseases now  
127 implicated with microbiome-host PPIs: Actin-related protein 2/3 complex subunit 2 (ARPC2) (associated  
128 in the Schirmer et al., Feng et al., Yu et al. and Zeller et al. cohorts) regulates the remodeling of epithelial  
129 adherens junctions, a common pathway disrupted in IBD (Franke et al., 2008). We see the targeting of  
130 mitogen-activated protein kinase kinase kinase 1 (MAP4K1) enriched in the Zeller *et al.* CRC  
131 cohort, which is in line with its role in inflammation (Chuang et al., 2016). DNA methyltransferase 3a  
132 (DNMT3A) is involved in chromatin remodeling and has been shown to be important for intestinal  
133 tumorigenesis (Weis et al., 2015), serve as a risk loci in genome-wide association studies (GWAS) studies  
134 for Crohn's disease (Franke et al., 2010), mediates insulin resistance (You et al.) and has aberrant  
135 expression in adipose tissue in mice (Kamei et al., 2010). Concordantly, it was associated with the CRC,  
136 IBD, T2D and obesity microbiome studies we examined (Feng et al., Yu et al., Zeller et al., LeChatelier et  
137 al., Qin et al. and Schirmer et al.). This host-centric annotation is useful beyond large-scale analysis of  
138 metagenomic data, as it broadly enables hypothesis-driven research into the protein-mediated mechanisms  
139 underlying microbiome impacts on host health.

140 Although the set of experimentally-verified interactions (HBNet) includes interactions originating from  
141 82 unique bacterial species, an initial concern was that a disproportionate number of bacteria-human PPIs  
142 are derived from high-throughput screens performed on a smaller number of intracellular pathogens, *e.g.*  
143 *Salmonella enterica* (Walch et al., 2021), *Yersinia pestis* (Dyer et al., 2010; Yang et al., 2011),  
144 *Francisella tularensis* (Dyer et al., 2010), *Acinetobacter baumannii* (Schweppe et al., 2015),  
145 *Mycobacterium tuberculosis* (Penn et al., 2018), *Coxiella burnetii* (Wallqvist et al., 2017), *Chlamydia*  
146 *trachomatis* (Mirrashidi et al., 2015) and *Legionella pneumophila* (Yu et al., 2015), *Burkholderia mallei*  
147 (Memisević et al., 2013), and *Bacillus anthracis* (Dyer et al., 2010); as well as one extracellular pathogen  
148 *Streptococcus pyogenes* (Happonen et al., 2019) (Table S4). Despite this bias, we find that homologs  
149 detected in patient microbiomes come from a set of 821 species that better reflects the phyla typically  
150 associated with human gut microbiomes (Fig. 1E).

### 151 **Microbiome proteins access human proteins by various means**

152 We next examined the localization of human protein targets. Amongst those human proteins in the  
153 detected and disease-associated sets, we saw increasing enrichment of genes expressed in epithelium,  
154 liver, adipose tissue and blood components (Fig. 2A). Although we presume many of the interactions  
155 occur within in the epithelial layer of the gastrointestinal tract, disease-associated human interactors were  
156 not especially localized to gastrointestinal tissue, nor any tissue in particular, with the exception of bone  
157 marrow ( $p=0.047$ , chi-square test) (Fig. S8). Impaired intestinal barrier function and the translocation of  
158 commensal bacteria, both of which feature in the pathogenesis of IBD (Ahmad et al., 2017), CRC (Genua  
159 et al., 2021) and other microbiome-associated disorders (Ruff et al., 2020), allow bacterial proteins to  
160 access tissues exterior to the gut. Nevertheless, we suspect that the absence of enrichment in gut tissues  
161 largely reflects the human tissues, cells, and fluids used for experimental interaction screening (*e.g.* HeLa  
162 cells (Walch et al., 2021), HEK293T (Mirrashidi et al., 2015), macrophages (Walch et al., 2021), plasma  
163 (Happonen et al., 2019), saliva (Happonen et al., 2019), spleen (Dyer et al., 2010; Yang et al., 2011), and  
164 lung (Schweppe et al., 2015)), thereby selecting proteins with more general expression patterns. This data  
165 underscores the need for screening using gastroenterological protein libraries to identify gut-specific host-  
166 microbiome PPIs.

167 At the cellular level, microbial proteins can access human proteins via several well-established means  
168 (Fig. 2B). Canonical MAMPs tend to involve surface receptors (*e.g.* TLRs, Nod-like receptors), which  
169 comprise 59.2% of the disease-associated interactors (Fig. 2C), although we cannot confirm their  
170 orientation. We expect that this may be an underestimate of the interactions involving human membrane  
171 interactors, as solubility issues preclude their representation in interaction screens. In addition to



172 canonical MAMP receptors, newly described surface receptors include: adhesion G protein-coupled  
173 receptor E1 (ADGRE1), a protein involved in regulatory T cell development (Lin et al., 2005); and  
174 receptor-type tyrosine-protein phosphatase mu (PTPRM), involved in cadherin-related cell adhesion  
175 (Brady-Kalnay et al., 1995), among others. Alternatively, several established host-microbiome PPIs  
176 (Table 1) involve human proteins that are secreted, such as the extracellular matrix protein laminin (Singh  
177 et al., 2018) and immune modulators, such as extra-cellular histones (Brinkmann et al., 2004; Murphy et  
178 al., 2014). Secreted proteins make up 34.8% of the disease-targeted human interactors, and include these,  
179 in addition to the cytokine IL-8, galectin-3, and complement 4A.

180 Interestingly, a large number of disease-associated human interactors (178 proteins, or 29.1%) are  
181 exclusively intracellular (Fig. 2C), suggesting additional interaction schemes. MAM (microbial anti-  
182 inflammatory molecule), a secreted protein from *Faecalibacterium prausnitzii*, can inhibit NF- $\kappa$ B  
183 signaling and increase tight junction integrity, whether it is introduced via gavage in mouse models, or  
184 when it is ectopically expressed from within intestinal epithelial cells *in vitro* (Xu et al., 2020), suggesting  
185 that it is uptaken by cells *in vivo*. Bacterial products or, in some cases, intact bacteria, may be endo-, pino-  
186 or transcytosed, a process that can be initiated by receptors (Malyukova et al., 2009; Tan et al., 2015),  
187 allowing bacterial proteins to access cytoplasmic and even nuclear targets. Alternatively, membrane  
188 vesicles, decorated with proteins and carrying periplasmic, cytoplasmic and intracellular membrane  
189 proteins as cargo, can be uptaken by human cells via endocytosis or membrane diffusion (Jones et al.,  
190 2020). Although membrane vesicles have been well-documented in Gram-negative bacteria, an example  
191 of vesicle production by Gram positive segmented filamentous bacteria was recently shown to interact  
192 with intestinal epithelial cells and promote the induction of Th17 cells (Ladinsky et al., 2019).

193 Accordingly, bacterial proteins interacting with human secreted and surface proteins would be expected to  
194 contain signatures of surface localization or extracellular secretion. Indeed, we find that 12.2% of the  
195 disease-associated microbiome proteins are predicted to contain signal peptides allowing for secretion by  
196 the Sec or Tat pathways (Fig. 2D), which are ubiquitous across phyla (Fig. S9). These systems typically  
197 work alongside additional secretion systems to situate proteins in the cell membrane or secrete them  
198 extracellularly, though their associated signal peptides are more difficult to predict (Green and Meccas,  
199 2016; Hui et al., 2021). Another 16.6% of disease-associated proteins are predicted to be transmembrane,  
200 albeit with unknown orientation, potentially allowing for direct contact with live or intact bacteria, or  
201 bacterially-produced membrane vesicles. A small number of proteins were found destined for the cell  
202 wall (Fig. 2D). To our surprise, secreted and surface proteins were found to be negatively enriched in the  
203 disease-associated bacterial interactors.

204 Finally, type 3, type 4 and type 6 secretion systems (T3SS, T4SS and T6SS) can be used to secrete  
205 proteins directly into human cells. Proteins with T3SS and T4SS signals make up a significant (13.6%),  
206 albeit diminishing portion of the disease-associated microbiome proteins (Fig. 2D). These proteins are  
207 mostly derived from gut Proteobacteria, to which these systems are generally restricted (Abby et al.,  
208 2016) (Fig. 2D, Fig. S9). Based on the bacterial cluster representatives from in the microbiomes from  
209 these nine cohorts, we find evidence that at least 79.0% and 58.9% of disease-associated clusters  
210 predicted to be secreted by T3SS and T4SS, respectively, have representative proteins found in organisms  
211 with the corresponding secretion systems (T6SS were excluded due to the limited availability of  
212 prediction tools). Nevertheless, the extent to which these systems, and orthologous systems in Gram  
213 positive bacteria (Madden et al., 2001), play a role in host-microbiome protein trafficking remains  
214 unknown. In total, this data suggests that there is not one single mechanism dominating host-microbiome  
215 interactions, but that interactions are facilitated by several means.

### 216 **Microbiome proteins gain host-relevant “moonlighting” annotations**

217 One of the major advantages of our work is that through this new interaction network, we vastly improve  
218 our ability to annotate host-relevant microbiome functions. 13.5% of our disease-associated bacterial  
219 clusters contain no members with annotated microbial pathways/functions in KEGG (Kyoto Encyclopedia

220 of Genes and Genomes) (Kanehisa et al., 2017) (Fig. 3A). Using similar homology searching against  
221 bacterial interactors, most of these genes can now be annotated according to the pathways of their human  
222 targets, obtaining a putative disease-relevant molecular mechanism (Fig. S10). Interestingly, most of the  
223 bacterial clusters with KEGG pathway annotations also gain a secondary human pathway annotation. Of  
224 those that could be annotated, disease-associated clusters are involved primarily in translation and central  
225 metabolism (Fig. 3B). This dual function is not entirely surprising, as a number of these have orthologs  
226 that have been previously identified as bacterial ‘moonlighting’ proteins, which perform secondary  
227 functions in addition to their primary role in the cell (Henderson, 2014). *Mycoplasma pneumoniae* GroEL  
228 and *Streptococcus suis* enolase, a protein involved in glycolysis, bind to both human plasminogen and  
229 extra-cellular matrix components (Hagemann et al., 2017; Henderson and Martin, 2013). *Mycobacterium*  
230 *tuberculosis* DnaK signals to leukocytes causing the release of the chemokines CCL3-5 (Lehner et al.,  
231 2000). *Streptococcus pyogenes* glyceraldehyde-3-phosphate dehydrogenase (GAPDH), canonically  
232 involved in glycolysis, can be shuffled to the cell surface where it plays a role as an adhesin, and can also  
233 contribute to human cellular apoptosis (Seidler and Seidler, 2013). These examples distinctly illustrate  
234 how bacterial housekeeping proteins are used by pathogens to modulate human health. In this study, we  
235 uncover commensal proteins that similarly may have ‘interspecies moonlighting’ functions and appear to  
236 be pervasive throughout our indigenous microbiota.

### 237 **Microbiome proteins may act on human targets as therapeutic drugs**

238 There is direct evidence for at least two commensal proteins which induce physiological effects on the  
239 host when delivered by oral gavage: purified *A. muciniphila* Amuc\_1100 and *F. prausnitzii* MAM to  
240 ameliorate glucose intolerance and colitis, respectively (Plovier et al., 2017; Xu et al., 2020). We suspect  
241 that this may extend to additional commensal proteins. Consistent with this idea, we find that indeed  
242 many disease-associated human proteins are known drug targets (Table S5). For example, nafamostat  
243 mesylate is an anticoagulant that can bind complement protein C1R, suppresses coagulation and  
244 fibrinolysis and provides protection against IBD (Isozaki et al., 2006) and CRC (Lu et al., 2016). These  
245 human proteins are also differentially targeted in healthy patients by the transcriptional regulator spo0A in  
246 Lactobacilli, Streptococci and *F. prausnitzii* (Fig. 4A, Table S6). Imatinib mesylate (brand name:  
247 Gleevec) targets several Src family tyrosine kinases, including LCK, which is involved in T cell  
248 development and has a recognized role in inflammation (Kumar Singh et al., 2018). Bacterial proteins  
249 targeting these same kinases are consistently enriched in healthy controls across both IBD and three CRC  
250 cohorts we analyzed (Fig. 4B, Table S6). In addition, imatinib can also halt the proliferation of colonic  
251 tumor cells and is involved generally in inflammatory pathways, through its inhibition of TNF-alpha  
252 production (Wolf et al., 2005).

253 We also find instances where the off-label effects or side effects associated with the drug match our  
254 microbiome-driven human protein association. For instance, the antimalarial drug artinemol targets  
255 human proteins that were found to be differentially targeted by IBD cohorts’ microbiomes (in Franzosa *et*  
256 *al.*): the RNA helicase DDX5, puromycin-sensitive aminopeptide (NPEPP), annexin A2 (ANXA2) and  
257 the splicing factor SFPQ (Fig.4C, Table S6). Whereas artinemol and related analogs have been shown to  
258 be effective at preventing dextran sulfate-induced colitis in mice (Hu et al., 2014; Yan et al., 2018) and  
259 wormwood, its natural source, has been established as a herbal treatment for IBD (Krebs et al., 2010),  
260 microbiota-derived proteins have greater association with IBD patients, suggesting that artinemol and  
261 commensal proteins may be acting on the same targets in opposing ways. Whereas the notion of  
262 microbiome-derived metabolites acting as drugs is well-appreciated (Donia and Fischbach, 2015; Wilson  
263 et al., 2019), this work broadens the scope of microbiome-derived drugs to include protein products acting  
264 through PPI.

### 265 **Discussion**

266 Here, we reveal an extensive host-microbiome PPI landscape. To achieve this, we benefit from existing  
267 methods in pathogen-host PPI discovery, further informed by community-level PPI profiles of genes  
268 differentially detected in human metagenomes. This work highlights host mechanisms targeted by the gut

269 microbiome and the extent to which these mechanisms are targeted across microbiome-related disorders.  
 270 However, this network is far from complete. Few of the studies on which this interaction network is based  
 271 were performed on commensal bacteria and intestinal tissue, and therefore, we may be missing  
 272 interactions specific to our most intimately associated bacteria. In support of our method, among those  
 273 host-microbiome PPIs that have been well-studied for both binding and their effect on human cellular  
 274 physiology or disease pathophysiologies (Table 1, Table S1), we were able to associate over half of the  
 275 PPIs with one or more metagenomic studies. In addition to large-scale PPI studies involving commensal  
 276 bacteria and their hosts, further in-depth studies will be needed to fully characterize these mechanisms,  
 277 such as whether these bacterial proteins activate or inhibit their human protein interactors' pathways, and  
 278 under what conditions these interactions take place.

279 This platform enables a high-throughput glimpse into the mechanisms by which microbes impact host  
 280 tissue, allowing for mechanistic inference and hypothesis generation from any metagenomic dataset.  
 281 Pinpointing microbe-derived proteins like this that interact directly with human proteins will enable the  
 282 discovery of novel diagnostics and therapeutics for microbiome-driven diseases, more nuanced definitions  
 283 of the host-relevant functional differences between bacterial strains, and a deeper understanding of the co-  
 284 evolution of humans and other organisms with their commensal microbiota.

285 **Table 1. Examples of experimentally-verified host-microbiome PPIs that affect human cellular**  
 286 **physiology and/or health.** Designations include whether the bacterial proteins were detected within the  
 287 nine metagenomic studies included in this analysis, and, if so, whether the human proteins were identified  
 288 by our method as 'disease-associated'. Extended information and citations are provided in Table S1.

| Bacterial protein (species origin)                                            | Human protein               | Evidence for role in disease                                                                                                      | Detection and Disease-association |
|-------------------------------------------------------------------------------|-----------------------------|-----------------------------------------------------------------------------------------------------------------------------------|-----------------------------------|
| Amuc_1100 ( <i>Akkermansia muciniphila</i> )                                  | Toll-like receptor 2 (TLR2) | IL-1 $\beta$ , IL-6, IL-8, IL-10 and TNF- $\alpha$ production in PBMCs; Increase in barrier function; Improves glucose tolerance. | Disease-associated                |
| Enolase (EnoA1) ( <i>Lactobacillus plantarum</i> )                            | Plasminogen                 | Enhancement of tissue-type plasminogen activator (tPA)-mediated conversion of plasminogen to plasmin.                             | Disease-associated                |
| FadA ( <i>Fusobacterium nucleatum</i> )                                       | E-cadherin                  | Stimulates proliferation of human CRC cell lines; Activates $\beta$ -catenin signaling pathways.                                  | Not disease-associated            |
| Faf ( <i>Finegoldia magna</i> )                                               | Histones H4 and H2B         | Binds histones and prevents antibacteriocidal activity.                                                                           | Not detected                      |
| Fap2 ( <i>Fusobacterium nucleatum</i> )                                       | TIGIT                       | Inhibits natural killer and tumor infiltrating lymphocyte cytotoxicity and hemagglutination of red blood cells.                   | Not detected                      |
| FimH (commensal <i>Escherichia coli</i> )                                     | GP2                         | Initiates mucosal immune response via M cells.                                                                                    | Not disease-associated            |
| Flagellin (FliC) (commensal Firmicutes)<br>Note: Direct binding has only been | Toll-like receptor 5 (TLR5) | Induces MyD88-dependent signaling and activation of NF- $\kappa$ B.                                                               | Not detected                      |

|                                                                                                              |                                                                                                                              |                                                                                                                        |                                                        |
|--------------------------------------------------------------------------------------------------------------|------------------------------------------------------------------------------------------------------------------------------|------------------------------------------------------------------------------------------------------------------------|--------------------------------------------------------|
| demonstrated for <i>Salmonella typhimurium</i> , though flagellin from commensal Firmicutes stimulates TLR5. |                                                                                                                              |                                                                                                                        |                                                        |
| GeIE ( <i>Enterococcus faecalis</i> )                                                                        | GLP-1, gastric inhibitory polypeptide, glucagon, leptin, PPY, PYY. MCP-1, TNF- $\alpha$ , mouse E-cadherin, C3 and iC3b      | Barrier function; Contributes to intestinal inflammation.                                                              | None are disease-associated                            |
| MAM ( <i>Faecalibacterium prausnitzii</i> )                                                                  | ZO- 1, DDX3X, ANXA2, FASN, FLNA, FLOT2, HSP90AB1, HSPA1B, JUP, KRT18, MYH9, PRDX1, PUF60, RACK1, RSL1D1, RPL14, RPL24, YWHAZ | Improves barrier function <i>in vitro</i> and <i>in vivo</i> ; Increases ZO-1 transcription; Inhibits NF-KB signaling. | 12/18 human interactors (black) are disease-associated |
| Mub ( <i>Lactobacillus plantarum</i> )                                                                       | Cytokeratins (1, 4, 5, 6, 8, 9, 10), Hsp90, Laminin                                                                          | Pathogenic exclusion (decrease in the adhesion of enterotoxigenic <i>E. coli</i> to intestinal epithelial cells).      | Not detected                                           |
| p9 (Amuc_1631) ( <i>Akkermansia muciniphila</i> )                                                            | Intercellular adhesion molecule 2 (ICAM2)                                                                                    | Increases GLP-1 secretion and brown adipose tissue thermogenesis.                                                      | Disease-associated                                     |
| SlpA ( <i>Lactobacillus acidophilus</i> )                                                                    | DC-SIGN                                                                                                                      | Th2 polarization of dendritic cells; Induction of IL-4 expression.                                                     | Not detected                                           |

## 290 **References**

- 291 Abby, S.S., Cury, J., Guglielmini, J., Néron, B., Touchon, M., and Rocha, E.P.C. (2016). Identification of  
292 protein secretion systems in bacterial genomes. *Sci. Rep.* *6*, 23080.
- 293 Ahmad, R., Sorrell, M.F., Batra, S.K., Dhawan, P., and Singh, A.B. (2017). Gut permeability and mucosal  
294 inflammation: bad, good or context dependent. *Mucosal Immunol.* *10*, 307–317.
- 295 Åkerström, B., and Björck, L. (2009). Bacterial Surface Protein L Binds and Inactivates Neutrophil  
296 Proteins S100A8/A9. *J. Immunol.* *183*, 4583–4592.
- 297 Alatshan, A., and Benkő, S. (2021). Nuclear Receptors as Multiple Regulators of NLRP3 Inflammasome  
298 Function. *Front. Immunol.* *0*.
- 299 Almagro Armenteros, J.J., Tsirigos, K.D., Sønderby, C.K., Petersen, T.N., Winther, O., Brunak, S., von  
300 Heijne, G., and Nielsen, H. (2019). SignalP 5.0 improves signal peptide predictions using deep neural  
301 networks. *Nat. Biotechnol.* *37*, 420–423.
- 302 Ammari, M.G., Gresham, C.R., McCarthy, F.M., and Nanduri, B. (2016). HPIDB 2.0: a curated database  
303 for host–pathogen interactions. *Database* *2016*.
- 304 Aramaki, T., Blanc-Mathieu, R., Endo, H., Ohkubo, K., Kanehisa, M., Goto, S., and Ogata, H. (2019).  
305 KofamKOALA: KEGG ortholog assignment based on profile HMM and adaptive score threshold.  
306 *Bioinforma. Oxf. Engl.*
- 307 Avram, S., Bologa, C.G., Holmes, J., Bocci, G., Wilson, T.B., Nguyen, D.-T., Curpan, R., Halip, L.,  
308 Bora, A., Yang, J.J., et al. (2021). DrugCentral 2021 supports drug discovery and repositioning. *Nucleic  
309 Acids Res.* *49*, D1160–D1169.
- 310 Beghini, F., McIver, L.J., Blanco-Míguez, A., Dubois, L., Asnicar, F., Maharjan, S., Mailyan, A.,  
311 Manghi, P., Scholz, M., Thomas, A.M., et al. (2021). Integrating taxonomic, functional, and strain-level  
312 profiling of diverse microbial communities with bioBakery 3. *ELife* *10*, e65088.
- 313 Bhavsar, A.P., Guttman, J.A., and Finlay, B.B. (2007). Manipulation of host-cell pathways by bacterial  
314 pathogens. *Nature* *449*, 827–834.
- 315 Brady-Kalnay, S.M., Rimm, D.L., and Tonks, N.K. (1995). Receptor protein tyrosine phosphatase  
316 PTPmu associates with cadherins and catenins in vivo. *J. Cell Biol.* *130*, 977–986.
- 317 Brinkmann, V., Reichard, U., Goosmann, C., Fauler, B., Uhlemann, Y., Weiss, D.S., Weinrauch, Y., and  
318 Zychlinsky, A. (2004). Neutrophil extracellular traps kill bacteria. *Science* *303*, 1532–1535.
- 319 Buchfink, B., Xie, C., and Huson, D.H. (2015). Fast and sensitive protein alignment using DIAMOND.  
320 *Nat. Methods* *12*, 59–60.
- 321 Burley, S.K., Berman, H.M., Kleywegt, G.J., Markley, J.L., Nakamura, H., and Velankar, S. (2017).  
322 Protein Data Bank (PDB): The Single Global Macromolecular Structure Archive. *Methods Mol. Biol.*  
323 *Clifton NJ* *1607*, 627–641.
- 324 Byrd, A.L., and Segre, J.A. (2016). Adapting Koch’s postulates. *Science* *351*, 224–226.



- 325 Chuang, H.-C., Wang, X., and Tan, T.-H. (2016). MAP4K Family Kinases in Immunity and  
326 Inflammation. *Adv. Immunol.* *129*, 277–314.
- 327 Daily, J. (2016). Parasail: SIMD C library for global, semi-global, and local pairwise sequence  
328 alignments. *BMC Bioinformatics* *17*, 81.
- 329 Ding, R., Qu, Y., Wu, C.H., and Vijay-Shanker, K. (2018). Automatic gene annotation using GO terms  
330 from cellular component domain. *BMC Med. Inform. Decis. Mak.* *18*, 119.
- 331 Donia, M.S., and Fischbach, M.A. (2015). Small molecules from the human microbiota. *Science* *349*,  
332 1254766.
- 333 Dyer, M.D., Neff, C., Dufford, M., Rivera, C.G., Shattuck, D., Bassaganya-Riera, J., Murali, T.M., and  
334 Sobral, B.W. (2010). The human-bacterial pathogen protein interaction networks of *Bacillus anthracis*,  
335 *Francisella tularensis*, and *Yersinia pestis*. *PloS One* *5*, e12089.
- 336 Eichinger, V., Nussbaumer, T., Platzer, A., Jehl, M.-A., Arnold, R., and Rattei, T. (2016). EffectiveDB--  
337 updates and novel features for a better annotation of bacterial secreted proteins and Type III, IV, VI  
338 secretion systems. *Nucleic Acids Res.* *44*, D669-674.
- 339 Eid, F.-E., ElHefnawi, M., and Heath, L.S. (2016). DeNovo: virus-host sequence-based protein-protein  
340 interaction prediction. *Bioinforma. Oxf. Engl.* *32*, 1144–1150.
- 341 Feng, Q., Liang, S., Jia, H., Stadlmayr, A., Tang, L., Lan, Z., Zhang, D., Xia, H., Xu, X., Jie, Z., et al.  
342 (2015). Gut microbiome development along the colorectal adenoma-carcinoma sequence. *Nat. Commun.*  
343 *6*, 6528.
- 344 Franke, A., Balschun, T., Karlsen, T.H., Sventoraityte, J., Nikolaus, S., Mayr, G., Domingues, F.S.,  
345 Albrecht, M., Nothnagel, M., Ellinghaus, D., et al. (2008). Sequence variants in IL10, ARPC2 and  
346 multiple other loci contribute to ulcerative colitis susceptibility. *Nat. Genet.* *40*, 1319–1323.
- 347 Franke, A., McGovern, D.P.B., Barrett, J.C., Wang, K., Radford-Smith, G.L., Ahmad, T., Lees, C.W.,  
348 Balschun, T., Lee, J., Roberts, R., et al. (2010). Genome-wide meta-analysis increases to 71 the number  
349 of confirmed Crohn's disease susceptibility loci. *Nat. Genet.* *42*, 1118–1125.
- 350 Franzosa, E.A., Sirota-Madi, A., Avila-Pacheco, J., Fornelos, N., Haiser, H.J., Reinker, S., Vatanen, T.,  
351 Brantley Hall, A., Mallick, H., McIver, L.J., et al. (2019). Gut microbiome structure and metabolic  
352 activity in inflammatory bowel disease. *Nat. Microbiol.* *4*, 293–305.
- 353 Genua, F., Raghunathan, V., Jenab, M., Gallagher, W.M., and Hughes, D.J. (2021). The Role of Gut  
354 Barrier Dysfunction and Microbiome Dysbiosis in Colorectal Cancer Development. *Front. Oncol.* *11*,  
355 626349.
- 356 Giancchetti, E., and Fierabracci, A. (2019). Recent Advances on Microbiota Involvement in the  
357 Pathogenesis of Autoimmunity. *Int. J. Mol. Sci.* *20*.
- 358 Green, E.R., and Meccas, J. (2016). Bacterial Secretion Systems – An overview. *Microbiol. Spectr.* *4*,  
359 10.1128/microbiolspec.VMBF-0012–2015.
- 360 Guven-Maiorov, E., Tsai, C.-J., and Nussinov, R. (2017a). Structural host-microbiota interaction  
361 networks. *PLoS Comput. Biol.* *13*, e1005579.

- 362 Guven-Maiorov, E., Tsai, C.-J., Ma, B., and Nussinov, R. (2017b). Prediction of Host-Pathogen  
363 Interactions for *Helicobacter pylori* by Interface Mimicry and Implications to Gastric Cancer. *J. Mol.*  
364 *Biol.* *429*, 3925–3941.
- 365 Guven-Maiorov, E., Tsai, C.-J., Ma, B., and Nussinov, R. (2019). Interface-Based Structural Prediction of  
366 Novel Host-Pathogen Interactions. *Methods Mol. Biol. Clifton NJ* *1851*, 317–335.
- 367 Hagemann, L., Gründel, A., Jacobs, E., and Dumke, R. (2017). The surface-displayed chaperones GroEL  
368 and DnaK of *Mycoplasma pneumoniae* interact with human plasminogen and components of the  
369 extracellular matrix. *Pathog. Dis.* *75*.
- 370 Hamiaux, C., van Eerde, A., Parsot, C., Broos, J., and Dijkstra, B.W. (2006). Structural mimicry for  
371 vinculin activation by IpaA, a virulence factor of *Shigella flexneri*. *EMBO Rep.* *7*, 794–799.
- 372 Hannigan, G.D., Duhaime, M.B., Ruffin, M.T., Koumpouras, C.C., and Schloss, P.D. (2018). Diagnostic  
373 Potential and Interactive Dynamics of the Colorectal Cancer Virome. *MBio* *9*.
- 374 Happonen, L., Hauri, S., Svensson Birkedal, G., Karlsson, C., de Neergaard, T., Khakzad, H., Nordenfelt,  
375 P., Wikström, M., Wisniewska, M., Björck, L., et al. (2019). A quantitative *Streptococcus pyogenes*-  
376 human protein-protein interaction map reveals localization of opsonizing antibodies. *Nat. Commun.* *10*,  
377 *2727*.
- 378 Henderson, B. (2014). An overview of protein moonlighting in bacterial infection. *Biochem. Soc. Trans.*  
379 *42*, 1720–1727.
- 380 Henderson, B., and Martin, A. (2013). Bacterial moonlighting proteins and bacterial virulence. *Curr. Top.*  
381 *Microbiol. Immunol.* *358*, 155–213.
- 382 Hu, D., Wang, Y., Chen, Z., Ma, Z., You, Q., Zhang, X., Zhou, T., Xiao, Y., Liang, Q., Tan, H., et al.  
383 (2014). Artemisinin protects against dextran sulfate-sodium-induced inflammatory bowel disease, which  
384 is associated with activation of the pregnane X receptor. *Eur. J. Pharmacol.* *738*, 273–284.
- 385 Huang, D.W., Sherman, B.T., and Lempicki, R.A. (2009). Systematic and integrative analysis of large  
386 gene lists using DAVID bioinformatics resources. *Nat. Protoc.* *4*, 44–57.
- 387 Hui, X., Chen, Z., Zhang, J., Lu, M., Cai, X., Deng, Y., Hu, Y., and Wang, Y. (2021). Computational  
388 prediction of secreted proteins in gram-negative bacteria. *Comput. Struct. Biotechnol. J.* *19*, 1806–1828.
- 389 Huo, T., Liu, W., Guo, Y., Yang, C., Lin, J., and Rao, Z. (2015). Prediction of host - pathogen protein  
390 interactions between *Mycobacterium tuberculosis* and *Homo sapiens* using sequence motifs. *BMC*  
391 *Bioinformatics* *16*, 100.
- 392 Isozaki, Y., Yoshida, N., Kuroda, M., Handa, O., Takagi, T., Kokura, S., Ichikawa, H., Naito, Y.,  
393 Okanoue, T., and Yoshikawa, T. (2006). Anti-tryptase treatment using nafamostat mesilate has a  
394 therapeutic effect on experimental colitis. *Scand. J. Gastroenterol.* *41*, 944–953.
- 395 Jess, T., Jensen, B.W., Andersson, M., Villumsen, M., and Allin, K.H. (2019). Inflammatory Bowel  
396 Disease Increases Risk of Type 2 Diabetes in a Nationwide Cohort Study. *Clin. Gastroenterol. Hepatol.*  
397 *Off. Clin. Pract. J. Am. Gastroenterol. Assoc.*

- 398 Joice, R., Yasuda, K., Shafquat, A., Morgan, X.C., and Huttenhower, C. (2014). Determining microbial  
399 products and identifying molecular targets in the human microbiome. *Cell Metab.* *20*, 731–741.
- 400 Jones, E.J., Booth, C., Fonseca, S., Parker, A., Cross, K., Miquel-Clopés, A., Hautefort, I., Mayer, U.,  
401 Wileman, T., Stentz, R., et al. (2020). The Uptake, Trafficking, and Biodistribution of Bacteroides  
402 thetaiotaomicron Generated Outer Membrane Vesicles. *Front. Microbiol.* *11*.
- 403 Jurjus, A., Eid, A., Al Kattar, S., Zeenny, M.N., Gerges-Geagea, A., Haydar, H., Hilal, A., Oueidat, D.,  
404 Matar, M., Tawilah, J., et al. (2016). Inflammatory bowel disease, colorectal cancer and type 2 diabetes  
405 mellitus: The links. *BBA Clin.* *5*, 16–24.
- 406 Kamei, Y., Suganami, T., Ehara, T., Kanai, S., Hayashi, K., Yamamoto, Y., Miura, S., Ezaki, O., Okano,  
407 M., and Ogawa, Y. (2010). Increased expression of DNA methyltransferase 3a in obese adipose tissue:  
408 studies with transgenic mice. *Obes. Silver Spring Md* *18*, 314–321.
- 409 Kanehisa, M., Furumichi, M., Tanabe, M., Sato, Y., and Morishima, K. (2017). KEGG: new perspectives  
410 on genomes, pathways, diseases and drugs. *Nucleic Acids Res.* *45*, D353–D361.
- 411 Kang, E.A., Han, K., Chun, J., Soh, H., Park, S., Im, J.P., and Kim, J.S. (2019). Increased Risk of  
412 Diabetes in Inflammatory Bowel Disease Patients: A Nationwide Population-based Study in Korea. *J.*  
413 *Clin. Med.* *8*.
- 414 Karlsson, F.H., Tremaroli, V., Nookaew, I., Bergström, G., Behre, C.J., Fagerberg, B., Nielsen, J., and  
415 Bäckhed, F. (2013). Gut metagenome in European women with normal, impaired and diabetic glucose  
416 control. *Nature* *498*, 99–103.
- 417 de Kort, S., Masclee, A.A.M., Sanduleanu, S., Weijenberg, M.P., van Herk-Sukel, M.P.P., Oldenhof,  
418 N.J.J., van den Bergh, J.P.W., Haak, H.R., and Janssen-Heijnen, M.L. (2017). Higher risk of colorectal  
419 cancer in patients with newly diagnosed diabetes mellitus before the age of colorectal cancer screening  
420 initiation. *Sci. Rep.* *7*, 46527.
- 421 Krebs, S., Omer, T.N., and Omer, B. (2010). Wormwood (*Artemisia absinthium*) suppresses tumour  
422 necrosis factor alpha and accelerates healing in patients with Crohn’s disease – A controlled clinical trial.  
423 *Phytomedicine* *17*, 305–309.
- 424 Krogh, A., Larsson, B., von Heijne, G., and Sonnhammer, E.L. (2001). Predicting transmembrane protein  
425 topology with a hidden Markov model: application to complete genomes. *J. Mol. Biol.* *305*, 567–580.
- 426 Kumar Singh, P., Kashyap, A., and Silakari, O. (2018). Exploration of the therapeutic aspects of Lck: A  
427 kinase target in inflammatory mediated pathological conditions. *Biomed. Pharmacother.* *108*, 1565–1571.
- 428 Ladinsky, M.S., Araujo, L.P., Zhang, X., Veltri, J., Galan-Diez, M., Soualhi, S., Lee, C., Irie, K., Pinker,  
429 E.Y., Narushima, S., et al. (2019). Endocytosis of commensal antigens by intestinal epithelial cells  
430 regulates mucosal T cell homeostasis. *Science* *363*, eaat4042.
- 431 Le Chatelier, E., Nielsen, T., Qin, J., Prifti, E., Hildebrand, F., Falony, G., Almeida, M., Arumugam, M.,  
432 Batto, J.-M., Kennedy, S., et al. (2013). Richness of human gut microbiome correlates with metabolic  
433 markers. *Nature* *500*, 541–546.
- 434 Lebeer, S., Vanderleyden, J., and De Keersmaecker, S.C.J. (2010). Host interactions of probiotic bacterial  
435 surface molecules: comparison with commensals and pathogens. *Nat. Rev. Microbiol.* *8*, 171–184.

- 436 Lehner, T., Bergmeier, L.A., Wang, Y., Tao, L., Sing, M., Spallek, R., and van der Zee, R. (2000). Heat  
437 shock proteins generate beta-chemokines which function as innate adjuvants enhancing adaptive  
438 immunity. *Eur. J. Immunol.* *30*, 594–603.
- 439 LeValley, S.L., Tomaro-Duchesneau, C., and Britton, R.A. (2020). Degradation of the Incretin Hormone  
440 Glucagon-Like Peptide-1 (GLP-1) by *Enterococcus faecalis* Metalloprotease GelE. *MSphere* *5*.
- 441 Li, J., Jia, H., Cai, X., Zhong, H., Feng, Q., Sunagawa, S., Arumugam, M., Kultima, J.R., Prifti, E.,  
442 Nielsen, T., et al. (2014). An integrated catalog of reference genes in the human gut microbiome. *Nat.*  
443 *Biotechnol.* *32*, 834–841.
- 444 Lin, H.-H., Faunce, D.E., Stacey, M., Terajewicz, A., Nakamura, T., Zhang-Hoover, J., Kerley, M.,  
445 Mucenski, M.L., Gordon, S., and Stein-Streilein, J. (2005). The macrophage F4/80 receptor is required  
446 for the induction of antigen-specific efferent regulatory T cells in peripheral tolerance. *J. Exp. Med.* *201*,  
447 1615–1625.
- 448 Lloyd-Price, J., Mahurkar, A., Rahnavard, G., Crabtree, J., Orvis, J., Hall, A.B., Brady, A., Creasy, H.H.,  
449 McCracken, C., Giglio, M.G., et al. (2017). Strains, functions and dynamics in the expanded Human  
450 Microbiome Project. *Nature* *550*, 61–66.
- 451 Lu, Y.-X., Ju, H.-Q., Wang, F., Chen, L.-Z., Wu, Q.-N., Sheng, H., Mo, H.-Y., Pan, Z.-Z., Xie, D., Kang,  
452 T.-B., et al. (2016). Inhibition of the NF- $\kappa$ B pathway by nafamostat mesilate suppresses colorectal cancer  
453 growth and metastasis. *Cancer Lett.* *380*, 87–97.
- 454 Madden, J.C., Ruiz, N., and Caparon, M. (2001). Cytolysin-Mediated Translocation (CMT): A Functional  
455 Equivalent of Type III Secretion in Gram-Positive Bacteria. *Cell* *104*, 143–152.
- 456 Malyukova, I., Murray, K.F., Zhu, C., Boedeker, E., Kane, A., Patterson, K., Peterson, J.R., Donowitz,  
457 M., and Kovbasnjuk, O. (2009). Macropinocytosis in Shiga toxin 1 uptake by human intestinal epithelial  
458 cells and transcellular transcytosis. *Am. J. Physiol. Gastrointest. Liver Physiol.* *296*, G78-92.
- 459 Memisević, V., Zavaljevski, N., Pieper, R., Rajagopala, S.V., Kwon, K., Townsend, K., Yu, C., Yu, X.,  
460 DeShazer, D., Reifman, J., et al. (2013). Novel *Burkholderia mallei* virulence factors linked to specific  
461 host-pathogen protein interactions. *Mol. Cell. Proteomics MCP* *12*, 3036–3051.
- 462 Mirrashidi, K.M., Elwell, C.A., Verschueren, E., Johnson, J.R., Frando, A., Von Dollen, J., Rosenberg,  
463 O., Gulbahce, N., Jang, G., Johnson, T., et al. (2015). Global Mapping of the Inc-Human Interactome  
464 Reveals that Retromer Restricts Chlamydia Infection. *Cell Host Microbe* *18*, 109–121.
- 465 Murphy, E.C., Mohanty, T., and Frick, I.-M. (2014). FAF and SufA: proteins of *Finlayella magna* that  
466 modulate the antibacterial activity of histones. *J. Innate Immun.* *6*, 394–404.
- 467 Nešić, D., Buti, L., Lu, X., and Stebbins, C.E. (2014). Structure of the *Helicobacter pylori* CagA  
468 oncoprotein bound to the human tumor suppressor ASP2. *Proc. Natl. Acad. Sci. U. S. A.* *111*, 1562–  
469 1567.
- 470 Orchard, S., Ammari, M., Aranda, B., Breuza, L., Briganti, L., Broackes-Carter, F., Campbell, N.H.,  
471 Chavali, G., Chen, C., del-Toro, N., et al. (2014). The MIntAct project--IntAct as a common curation  
472 platform for 11 molecular interaction databases. *Nucleic Acids Res.* *42*, D358-363.

- 473 Oughtred, R., Stark, C., Breitkreutz, B.-J., Rust, J., Boucher, L., Chang, C., Kolas, N., O'Donnell, L.,  
474 Leung, G., McAdam, R., et al. (2019). The BioGRID interaction database: 2019 update. *Nucleic Acids*  
475 *Res.* *47*, D529–D541.
- 476 Pasolli, E., Schiffer, L., Manghi, P., Renson, A., Obenchain, V., Truong, D.T., Beghini, F., Malik, F.,  
477 Ramos, M., Dowd, J.B., et al. (2017). Accessible, curated metagenomic data through ExperimentHub.  
478 *Nat. Methods* *14*, 1023–1024.
- 479 Pedregosa, F., Varoquaux, G., Gramfort, A., Michel, V., Thirion, B., Grisel, O., Blondel, M.,  
480 Prettenhofer, P., Weiss, R., Dubourg, V., et al. (2011). Scikit-learn: Machine Learning in Python. *J.*  
481 *Mach. Learn. Res.* *12*, 2825–2830.
- 482 Penn, B.H., Netter, Z., Johnson, J.R., Von Dollen, J., Jang, G.M., Johnson, T., Ohol, Y.M., Maher, C.,  
483 Bell, S.L., Geiger, K., et al. (2018). An Mtb-Human Protein-Protein Interaction Map Identifies a Switch  
484 between Host Antiviral and Antibacterial Responses. *Mol. Cell* *71*, 637-648.e5.
- 485 Piñero, J., Bravo, À., Queralt-Rosinach, N., Gutiérrez-Sacristán, A., Deu-Pons, J., Centeno, E., García-  
486 García, J., Sanz, F., and Furlong, L.I. (2017). DisGeNET: a comprehensive platform integrating  
487 information on human disease-associated genes and variants. *Nucleic Acids Res.* *45*, D833–D839.
- 488 Plovier, H., Everard, A., Druart, C., Depommier, C., Van Hul, M., Geurts, L., Chilloux, J., Ottman, N.,  
489 Duparc, T., Lichtenstein, L., et al. (2017). A purified membrane protein from *Akkermansia muciniphila* or  
490 the pasteurized bacterium improves metabolism in obese and diabetic mice. *Nat. Med.* *23*, 107–113.
- 491 Qin, J., Li, Y., Cai, Z., Li, S., Zhu, J., Zhang, F., Liang, S., Zhang, W., Guan, Y., Shen, D., et al. (2012).  
492 A metagenome-wide association study of gut microbiota in type 2 diabetes. *Nature* *490*, 55–60.
- 493 Ruff, W.E., Greiling, T.M., and Kriegel, M.A. (2020). Host–microbiota interactions in immune-mediated  
494 diseases. *Nat. Rev. Microbiol.* *18*, 521–538.
- 495 Schirmer, M., Franzosa, E.A., Lloyd-Price, J., McIver, L.J., Schwager, R., Poon, T.W., Ananthakrishnan,  
496 A.N., Andrews, E., Barron, G., Lake, K., et al. (2018). Dynamics of metatranscription in the  
497 inflammatory bowel disease gut microbiome. *Nat. Microbiol.* *3*, 337–346.
- 498 Schweppe, D.K., Harding, C., Chavez, J.D., Wu, X., Ramage, E., Singh, P.K., Manoil, C., and Bruce, J.E.  
499 (2015). Host-microbe protein interactions during bacterial infection. *Chem. Biol.* *22*, 1521–1530.
- 500 Seidler, K.A., and Seidler, N.W. (2013). Role of extracellular GAPDH in *Streptococcus pyogenes*  
501 virulence. *Mo. Med.* *110*, 236–240.
- 502 Sen, R., Nayak, L., and De, R.K. (2016). A review on host-pathogen interactions: classification and  
503 prediction. *Eur. J. Clin. Microbiol. Infect. Dis. Off. Publ. Eur. Soc. Clin. Microbiol.* *35*, 1581–1599.
- 504 Shah, P.S., Link, N., Jang, G.M., Sharp, P.P., Zhu, T., Swaney, D.L., Johnson, J.R., Von Dollen, J.,  
505 Ramage, H.R., Satkamp, L., et al. (2018). Comparative Flavivirus-Host Protein Interaction Mapping  
506 Reveals Mechanisms of Dengue and Zika Virus Pathogenesis. *Cell* *175*, 1931-1945.e18.
- 507 Singh, K.S., Kumar, S., Mohanty, A.K., Grover, S., and Kaushik, J.K. (2018). Mechanistic insights into  
508 the host-microbe interaction and pathogen exclusion mediated by the Mucus-binding protein of  
509 *Lactobacillus plantarum*. *Sci. Rep.* *8*, 14198.



- 510 Slenter, D.N., Kutmon, M., Hanspers, K., Riutta, A., Windsor, J., Nunes, N., Mélius, J., Cirillo, E., Coort,  
511 S.L., Digles, D., et al. (2018). WikiPathways: a multifaceted pathway database bridging metabolomics to  
512 other omics research. *Nucleic Acids Res.* *46*, D661–D667.
- 513 Stewart, L., D M Edgar, J., Blakely, G., and Patrick, S. (2018). Antigenic mimicry of ubiquitin by the gut  
514 bacterium *Bacteroides fragilis*: a potential link with autoimmune disease. *Clin. Exp. Immunol.* *194*, 153–  
515 165.
- 516 Stidham, R.W., and Higgins, P.D.R. (2018). Colorectal Cancer in Inflammatory Bowel Disease. *Clin.*  
517 *Colon Rectal Surg.* *31*, 168–178.
- 518 Suzek, B.E., Wang, Y., Huang, H., McGarvey, P.B., Wu, C.H., and UniProt Consortium (2015). UniRef  
519 clusters: a comprehensive and scalable alternative for improving sequence similarity searches.  
520 *Bioinforma. Oxf. Engl.* *31*, 926–932.
- 521 Tan, Y., Zanoni, I., Cullen, T.W., Goodman, A.L., and Kagan, J.C. (2015). Mechanisms of Toll-like  
522 Receptor 4 Endocytosis Reveal a Common Immune-Evasion Strategy Used by Pathogenic and  
523 Commensal Bacteria. *Immunity* *43*, 909–922.
- 524 Uhlen, M., Oksvold, P., Fagerberg, L., Lundberg, E., Jonasson, K., Forsberg, M., Zwahlen, M., Kampf,  
525 C., Wester, K., Hober, S., et al. (2010). Towards a knowledge-based Human Protein Atlas. *Nat.*  
526 *Biotechnol.* *28*, 1248–1250.
- 527 Valledor, A.F., Hsu, L.-C., Ogawa, S., Sawka-Verhelle, D., Karin, M., and Glass, C.K. (2004). Activation  
528 of liver X receptors and retinoid X receptors prevents bacterial-induced macrophage apoptosis. *Proc. Natl.*  
529 *Acad. Sci.* *101*, 17813–17818.
- 530 Walch, P., Selkig, J., Knodler, L.A., Rettel, M., Stein, F., Fernandez, K., Viéitez, C., Potel, C.M.,  
531 Scholzen, K., Geyer, M., et al. (2021). Global mapping of *Salmonella enterica*-host protein-protein  
532 interactions during infection. *Cell Host Microbe*.
- 533 Wallqvist, A., Wang, H., Zavaljevski, N., Memišević, V., Kwon, K., Pieper, R., Rajagopala, S.V., and  
534 Reifman, J. (2017). Mechanisms of action of *Coxiella burnetii* effectors inferred from host-pathogen  
535 protein interactions. *PloS One* *12*, e0188071.
- 536 Weis, B., Schmidt, J., Maamar, H., Raj, A., Lin, H., Tóth, C., Riedmann, K., Raddatz, G., Seitz, H.-K.,  
537 Ho, A.D., et al. (2015). Inhibition of intestinal tumor formation by deletion of the DNA methyltransferase  
538 3a. *Oncogene* *34*, 1822–1830.
- 539 Wilson, M.R., Jiang, Y., Villalta, P.W., Stornetta, A., Boudreau, P.D., Carrá, A., Brennan, C.A., Chun, E.,  
540 Ngo, L., Samson, L.D., et al. (2019). The human gut bacterial genotoxin colibactin alkylates DNA.  
541 *Science* *363*.
- 542 Wishart, D.S., Feunang, Y.D., Guo, A.C., Lo, E.J., Marcu, A., Grant, J.R., Sajed, T., Johnson, D., Li, C.,  
543 Sayeeda, Z., et al. (2018). DrugBank 5.0: a major update to the DrugBank database for 2018. *Nucleic*  
544 *Acids Res.* *46*, D1074–D1082.
- 545 Wolf, A.M., Wolf, D., Rumpold, H., Ludwiczek, S., Enrich, B., Gastl, G., Weiss, G., and Tilg, H. (2005).  
546 The kinase inhibitor imatinib mesylate inhibits TNF- $\alpha$  production in vitro and prevents TNF-  
547 dependent acute hepatic inflammation. *Proc. Natl. Acad. Sci. U. S. A.* *102*, 13622–13627.

- 548 Wu, C.H., Nikolskaya, A., Huang, H., Yeh, L.-S.L., Natale, D.A., Vinayaka, C.R., Hu, Z.-Z., Mazumder,  
549 R., Kumar, S., Kourtesis, P., et al. (2004). PIRSF: family classification system at the Protein Information  
550 Resource. *Nucleic Acids Res.* 32, D112-114.
- 551 Xu, J., Liang, R., Zhang, W., Tian, K., Li, J., Chen, X., Yu, T., and Chen, Q. (2020). Faecalibacterium  
552 prausnitzii- derived microbial anti- inflammatory molecule regulates intestinal integrity in diabetes  
553 mellitus mice via modulating tight junction protein expression. *J. Diabetes* 12, 224–236.
- 554 Yan, Y., Shao, M., Qi, Q., Xu, Y., Yang, X., Zhu, F., He, S., He, P., Feng, C., Wu, Y., et al. (2018).  
555 Artemisinin analogue SM934 ameliorates DSS-induced mouse ulcerative colitis via suppressing  
556 neutrophils and macrophages. *Acta Pharmacol. Sin.* 39, 1633–1644.
- 557 Yang, H., Ke, Y., Wang, J., Tan, Y., Myeni, S.K., Li, D., Shi, Q., Yan, Y., Chen, H., Guo, Z., et al.  
558 (2011). Insight into Bacterial Virulence Mechanisms against Host Immune Response via the Yersinia  
559 pestis-Human Protein-Protein Interaction Network. *Infect. Immun.* 79, 4413–4424.
- 560 You, D., Nilsson, E., Tenen, D.E., Lyubetskaya, A., Lo, J.C., Jiang, R., Deng, J., Dawes, B.A., Vaag, A.,  
561 Ling, C., et al. Dnmt3a is an epigenetic mediator of adipose insulin resistance. *ELife* 6, e30766.
- 562 Yu, J., Feng, Q., Wong, S.H., Zhang, D., Liang, Q.Y., Qin, Y., Tang, L., Zhao, H., Stenvang, J., Li, Y., et  
563 al. (2017). Metagenomic analysis of faecal microbiome as a tool towards targeted non-invasive  
564 biomarkers for colorectal cancer. *Gut* 66, 70–78.
- 565 Yu, N.Y., Wagner, J.R., Laird, M.R., Melli, G., Rey, S., Lo, R., Dao, P., Sahinalp, S.C., Ester, M., Foster,  
566 L.J., et al. (2010). PSORTb 3.0: improved protein subcellular localization prediction with refined  
567 localization subcategories and predictive capabilities for all prokaryotes. *Bioinformatics* 26, 1608–1615.
- 568 Yu, X., Decker, K.B., Barker, K., Neunuebel, M.R., Saul, J., Graves, M., Westcott, N., Hang, H., LaBaer,  
569 J., Qiu, J., et al. (2015). Host-pathogen interaction profiling using self-assembling human protein arrays.  
570 *J. Proteome Res.* 14, 1920–1936.
- 571 Zeller, G., Tap, J., Voigt, A.Y., Sunagawa, S., Kultima, J.R., Costea, P.I., Amiot, A., Böhm, J., Brunetti,  
572 F., Habermann, N., et al. (2014). Potential of fecal microbiota for early-stage detection of colorectal  
573 cancer. *Mol. Syst. Biol.* 10, 766.

574

## 575 **Acknowledgments**

576 We wish to acknowledge members of the Brito lab, Indrayudh Ghosal, Giles Hooker and Andy Clark for  
577 their thoughtful comments. Funding: Ilana Brito is a Pew Scholar in Biomedical Sciences, a Packard  
578 Foundation Fellow, and a Sloan Foundation Research Fellow. Ilana Brito is funded by the National  
579 Institutes of Health (1DP2HL141007).

580 Author contributions: H.Z., J.F.B and I.L.B. conceptualized and designed the study and co-wrote the  
581 manuscript. Competing Interests: Provisional patents have been filed for both the process and  
582 therapeutic/diagnostic protein candidates found herein by Cornell University. Inventors: I.L.B. and J.F.B.  
583 Data and materials availability: All data used for this paper is publicly available and described in the  
584 Methods and in Table S2. Disease-associated human-microbiome PPIs are listed in Table S3.

585

## 586 **Figures**

587

### 588 **Figure 1. Human proteins differentially targeted by the microbiome in disease are enriched for** 589 **relevant gene-disease associations.**

590 (A) The number of interspecies bacterial protein clusters (blue), human proteins (orange) and interactions  
591 (dark blue) in the human-bacteria PPI network; the number of bacterial protein clusters detected in  
592 patients from nine metagenomic studies that also have homology to experimentally-verified interactors  
593 and their putative human interactors; and the number of bacterial clusters and human proteins associated  
594 with disease through our metagenomic machine learning approach, by comparing abundances in cases  
595 (grey) and control (red). (B) Proportions of human proteins implicated in disease, according to their  
596 GDAs (GDAs > 0.1) in DisGeNET, within: all reviewed human proteins; HBNet; human interactors with  
597 detected bacterial proteins; and those human interactors with feature importances above the 90<sup>th</sup> percentile  
598 in their respective cohorts. p-values for enrichments are depicted by: \* p<0.05; \*\* p<0.01; \*\*\* p<10<sup>-3</sup>;  
599 \*\*\*\* p<10<sup>-4</sup> (Chi-square test). Total numbers of each set are noted in the legend. (C) Human cellular  
600 pathways (annotated by IPA) enriched in the set of human proteins within HBNet (left) and those detected  
601 across all nine metagenomic case-control studies (right) colored according to their Benjamini-Hochberg  
602 false discovery rate (BH-FDR)-adjusted p-value. Only those pathways with BH-FDR-adjusted < 0.05 in the  
603 disease-associated sets are shown. p-values for enrichments are depicted by: \* p<0.05; \*\* p<0.01; \*\*\*  
604 p<10<sup>-3</sup>; \*\*\*\* p<10<sup>-4</sup> (Fisher's Exact test). (D) All human proteins within the Clathrin-Mediated  
605 Endocytosis Signaling pathway, as annotated by IPA, are depicted. Protein targets detected in the nine  
606 metagenomic studies are highlighted in orange. Those in the Disease-associated subset are in brown.  
607 Specific interactions and the nature of interactions were simplified, with boxes roughly representing  
608 proteins within the same signaling cascade and/or complex. (E) 106 species (left) with experimentally  
609 verified proteins in 3,056 bacterial protein clusters are mapped to 821 bacterial species (right) with  
610 homologs detected in patients' metagenomes (right), representing a total of 1,698 clusters. Species are  
611 colored according to phylum.

612

### 613 **Figure 2. Bacterial proteins gain access to human proteins through a variety of mechanisms.**

614 (A) Proportions of human proteins in the HBNet, Detected and Disease-associated subsets are plotted  
615 according to their enrichments in tissues and fluids, as annotated using DAVID. Only those with  
616 significant enrichment between any two subsets are shown. p-values for enrichments are depicted by: \*  
617 p<0.05; \*\* p<0.01; \*\*\* p<0.001; \*\*\*\* p<0.0001 (EASE Score provided by DAVID, a modified Fisher  
618 Exact P-value; FDR-adjusted). Total numbers of each set are noted in the legend. (B) A schematic  
619 depicting potential opportunities for bacterial proteins to access human proteins. Interactions may  
620 involve: (1) secreted human proteins, (2) bacterial proteins secreted into the extracellular space; (3)  
621 membrane vesicles that are endocytosed or can fuse with human cell membranes; (4) bacterial cellular  
622 lysate; (5) proteins injected into human cells by T3SS, T4SS and T6SS, (6) cells and their products that  
623 translocate as a result of barrier dysfunction or "leaky gut", and/or (7) direct contact with M cells,  
624 dendritic cells (DC), or epithelial cells. (C) Proportions of human proteins in the HBNet, Detected and  
625 Disease-associated subsets, are plotted according to their subcellular locations, as annotated using Gene  
626 Ontology Cellular Component, is depicted. p-values for enrichments are depicted by: \* p<0.05; \*\*  
627 p<0.01; \*\*\* p<0.001; \*\*\*\* p<0.0001 (Chi-square test). Total percentages for these subsets is listed at  
628 right, along with p-values. Total numbers of each set are noted in the legend. (D) Proportions of bacterial  
629 gene clusters in the HBNet, Detected and Disease-associated subsets are plotted according to their  
630 transmembrane and secretion predictions, annotated using TMHMM, EffectiveDB and SignalP. p-values  
631 for enrichments are depicted by: \* p<0.05; \*\* p<0.01; \*\*\* p<0.001; \*\*\*\* p<0.0001 (Chi-square test).  
632 Total numbers of each set are noted in the legend.

633

### 634 **Figure 3. Human pathway annotation can be propagated through interactors to improve bacterial** 635 **pathway annotation.**

636 (A) Paired stacked bar plots showing the 1,102 disease-associated bacterial protein clusters according to  
637 whether they are able to be annotated by KEGG (left) and their inferred pathways according to the human  
638 proteins they target (right), as annotated by WikiPathways (Slenter et al., 2018). (B) Proportions of the  
639 bacterial clusters in the HBNet, Detected and Disease-associated subsets according to their COG  
640 functional categories are plotted. p-values are depicted by: \*  $p < 0.05$ ; \*\*  $p < 0.01$ ; \*\*\*  $p < 0.001$ ; \*\*\*\*  
641  $p < 0.0001$  (Chi-square test). Total numbers of each set are noted in the legend.  
642

643 **Figure 4. Human proteins targeted by gut commensal proteins include known therapeutic drug**  
644 **targets.**

645 (A) Nafamostat, (B) imatinib and (C) arteminol target human proteins that are differentially targeted by  
646 bacterial proteins detected in the stated metagenomic studies.  $\log_{10}$  relative mean summed abundances of  
647 bacterial interactors in patients versus controls are provided. p-values were calculated by the Mann-  
648 Whitney rank-sum test, \*  $p < 0.05$ ; \*\*  $p < 0.01$ ; \*\*\*  $p < 10^{-3}$ ; \*\*\*\*  $p < 10^{-4}$ ). Full taxa and UniRef numbers for  
649 all bacterial proteins shown are provided in Table S6.

## 650 **Methods**

651

### 652 **Building a putative bacteria-human protein-protein interaction (PPI) network**

653 Interactions were downloaded from the IntAct database (Orchard et al., 2014), HPIdb 3.0 (Ammari et al.,  
654 2016) and BioGRID (Oughtred et al., 2019) [June 2021], and supplemented with additional host-microbe  
655 interaction studies, whose interactions were added manually (PMIDs: 31227708, 34237247, 22213674,  
656 18937849, 8900134, 17709412, 19047644, 23954158, 24335013, 24936355, 25680274, 26548613,  
657 28281568, 29748286, 30072965, 30242281, 32566649, 32736072, 18808384, 22344444, 33820962,  
658 31611645, 32051237, 18941224, 19627615, 3125250, 19752232, 21441512, 19542010, 11113124,  
659 29335257, 21740499, 18541478, 9466265, 24204276, 23800426, 27302108, 25739981, 19907495,  
660 31503404, 25118235, 25788290, 21699778, 26755725, 14625549). Only interactions with evidence  
661 codes that indicated binary, experimental determination of the interaction between UniProt identifiers  
662 with non-matching taxa were preserved, thereby excluding co-complex associations, small molecule  
663 interactions, and predicted interactions. Uniref100/90 clusters containing human proteins and Uniref50  
664 cluster containing bacterial proteins were downloaded from UniProt [June 2021], to which interspecies  
665 protein interactors were mapped (Suzek et al., 2015). PPIs comprising one Uniref100/90 cluster  
666 containing human proteins and one Uniref50 cluster containing bacterial proteins were retained for  
667 downstream analyses. Within each UniRef50 bacterial cluster, we further filtered the sequences such that  
668 only bacterial members of the cluster within 70% sequence similarity to the experimentally verified  
669 protein were labeled as putative interactors. Sequence similarity was calculated using a Smith-Waterman  
670 local alignment with the BLOSUM62 matrix via python's parasail (Daily, 2016) library (v.1.1.17) and  
671 tallying the number of matches in the pairwise alignment that represent frequent substitutions (non-  
672 negative BLOSUM62 scores), divided by the length of the experimentally-verified interactor.

673

### 674 **Processing of metagenomic shotgun sequencing data**

675 The datasets used in this study, with the exception of the PRISM dataset (Franzosa et al., 2019), were  
676 curated as part of ExperimentHub (Pasolli et al., 2017) (Table S1). Within each study, we removed  
677 samples that had abnormally low (less than  $10^7$ ) reads. We downloaded all protein abundance matrices,  
678 annotated at the level of UniRef90 clusters via HUMAnN3 (Beghini et al., 2021), and associated  
679 metadata. For PRISM, we processed data in a parallel manner, as outlined in Pasolli et al. (Pasolli et al.,  
680 2017). For each study, we mapped UniRef90 bacterial clusters to UniRef50 clusters using DIAMOND  
681 (Buchfink et al., 2015) blastp, requiring greater than 90% sequence identity and greater than 90%  
682 coverage.

683

### 684 **Prioritization of disease-associated human targets**

685 For each patient, we generate a file of human proteins representing the cumulative abundances of their  
686 putative bacterial protein interactors. In each study, we filtered out proteins present in fewer than 5% of  
687 the cohort. To identify host-microbiome interactions that associate with disease, processed abundance  
688 matrices of putative human interactors were used to train a random forest machine learning classifier on  
689 the task of separating case and control patients and, after verifying that they achieve reasonable  
690 performance on the task using five-fold cross-validation with grid search-based hyperparameters tuning  
691 for each study (Fig. S6), we extract the average feature importance from 100 iteratively trained class-  
692 balanced classifiers. Having used the scikit-learn (Pedregosa et al., 2011) implementation of the random  
693 forest algorithm, feature importance corresponds to the average Gini impurity of the feature in all splits  
694 that it was involved in. Gini feature importance is a powerful prioritization tool, as it can capture the  
695 multivariate feature importance (whereas simple metrics like log-odds ratio and corrected chi-squared  
696 statistics only capture univariate feature importance). We created a disease-associated set for the proteins  
697 that had feature importances above the top 90<sup>th</sup> percentile. As an alternative to calculating human protein  
698 abundances by summing the total bacterial abundances of their interactors, we tested the effect of first



699 normalizing bacterial abundances by their respective number of putative human interactors. This did not  
700 qualitatively change the conclusions drawn from our analyses.

701

### 702 **Human pathway annotation and enrichment analysis**

703 Disease annotations were extracted from all of GDAs from DisGeNET (Piñero et al., 2017) (June 2021).  
704 We additionally downloaded all reviewed human proteins from Uniprot (Ding et al., 2018) (June 2021),  
705 annotating them in the same manner, in order to accurately compare background label frequencies.  
706 Lacking a simple hierarchy of disease, we binned similar disease terms into the 5 larger categories  
707 relevant to our study. Human protein identifier labels are provided in Supplementary Note 1. We  
708 performed pathway enrichment analysis using QIAGEN's Ingenuity® Pathway Analysis software (IPA®,  
709 QIAGEN Redwood City, CA, USA, [www.qiagen.com/ingenuity](http://www.qiagen.com/ingenuity)). Sets of human proteins (HBNET,  
710 Detected, Disease-associated) were uploaded as UniProt identifiers into the desktop interface and  
711 submitted to their webserver for Core Enrichment Analysis was conducted only on human tissue and cell  
712 lines and IPA's stringent evidence filter. Pathways were considered enriched if they had Benjamini-  
713 Hochberg-corrected p values < 0.05. Subcellular locations for human proteins were obtained using GO  
714 Cellular Component terms associated with each protein in UniProt. We aggregated the following GO  
715 terms: Extracellular: Extracellular region (GO:0005576), Extracellular matrix (GO:0031012); Membrane:  
716 Cell surface (GO:0009986); Membrane (GO:0016020), Cell junction (GO:0030054); Cell projection  
717 (GO:0042995); and Intracellular: Cytoplasm (GO:0005737); Cell body (GO:0044297); Nucleoid  
718 (GO:0009295); Membrane-enclosed lumen (GO:0031974); Organelle (GO:0043226); Endomembrane  
719 system (GO:0012505); Midbody (GO:0030496). Tissue-specific RNA expression enrichment was  
720 performed using DAVID bioinformatics resources (Huang et al., 2009). Additionally, tissue-specific  
721 protein localization data was downloaded from Human Protein Atlas version 20.1 (Uhlen et al., 2010).  
722 We retained those with 'enhanced', 'supported' and 'approved' reliability. We additionally annotated all  
723 human proteins with any known drug targets from the DrugBank database (Wishart et al., 2018) and  
724 DrugCentral (June 2021) (Avram et al., 2021).

725

### 726 **Bacterial pathway, secretion, and taxonomy annotation**

727 For the purposes of annotation, we selected the representative bacterial sequence of each cluster. If there  
728 was no bacterial representative, we sorted sequences by their status in Uniprot (reviewed/unreviewed) and  
729 by their length and chose the top sequence. Bacterial taxonomy information is associated with each  
730 UniRef90 cluster by HUMANN3 (Beghini et al., 2021). We submitted all bacterial protein sequences to  
731 the KofamKOALA (Aramaki et al., 2019) KEGG orthology search resource to obtain orthology and  
732 pathway annotations. To obtain secretion information, we used several sources: we submitted our  
733 bacterial sequences to EffectiveDB (Eichinger et al., 2016) in order to obtain predictions for EffectiveT3  
734 (type 3 secretion based on signal peptide) and T4SEpre (type 4 secretion based on amino acid  
735 composition at the C-terminus). We used the single default cutoffs for T4SEpre, and chose the 'selective'  
736 (0.9999) cutoff for EffectiveT3. We obtained predictions for Sec and Tat pathway secretion using SignalP  
737 5.0 (Almagro Armenteros et al., 2019) for Gram positive and Gram negative bacteria using default  
738 settings. Transmembrane proteins or signal peptides were predicted using TMHMM (Krogh et al., 2001)  
739 (v.2.0c), with a threshold of 19 or more expected number of amino acids in transmembrane helices.  
740 Localization to the cell wall was predicted using PSORTb 3.0 (Yu et al., 2010) with default settings. We  
741 annotated secretion systems in species associated with each bacterial cluster by examining the core or  
742 minimal components of each secretion system, by searching their genomes using KEGG orthologous  
743 groups for each system using string cutoffs (identity > 40%; e-value < 0.00001; coverage > 80%): T3SS:  
744 sctR (K03226), sctS (K03227), sctT (K03228), sctU (K03229), and sctV (K03230); T4SS: virB4  
745 (K03199) and virD4 (K03205); Sec: secY (K03076), secE (K03073), and secG (K03075); and Tat: tatA  
746 (K03116) and tatC (K03118). We defined genomes in which have all minimal components of each system  
747 as organisms with functional corresponding secretion systems.

748

### 749 **Structural data for these microbiome-human PPIs**

750 We measured the extent to which structural interfaces could be used to infer microbiome-human protein-  
751 protein interaction by using DIAMOND (Buchfink et al., 2015) to query all amino acid sequences  
752 submitted to PDB (identity > 70%; coverage > 50%). In order to identify interface residues between each  
753 pair of chains in the cocrystal structures, we first use NACCESS  
754 (<http://www.bioinf.manchester.ac.uk/naccess/>) to calculate the solvent accessibility of each residue in  
755 each chain. Chains with an accessible surface area of 15 Å or more are considered surface residues. We  
756 then calculate the change in accessible surface area for each residue when other chains in the same crystal  
757 structures are introduced. Residues which have a change in solvent accessible surface area above 1 Å are  
758 determined to be interface residues. Cases in which human protein and bacterial proteins match their  
759 respective chains exclusively are in Table S7. We highlight one example in which there are uniquely  
760 mapped chains, where 1p0s chains H and E match human coagulation factor X and bacterial Ecotin,  
761 respectively (Fig. S11).

762 To assess conservation of interface residues across bacterial members of the same UniRef cluster, we  
763 downloaded a list of all PDB structures which contain both human proteins and bacterial proteins, the  
764 UniRef50 cluster identifier for the bacterial protein, and all protein sequences in the corresponding cluster  
765 that also originate from bacterial proteomes from Uniprot. Using Clustal Omega, we then generated  
766 multiple sequence alignments for all the members of each UniRef50 clusters. We calculated interface  
767 residues on all pairs of chains in each structures and measured the BLOSUM62 similarity between  
768 bacterial interface residues and their corresponding amino acids in their respective UniRef50 cluster  
769 MSA. We then calculated the Jensen-Shannon divergence on the columns of the MSA containing  
770 interface residues.

## 771 Supplemental Note 1

### 772 Terminology used for gene-disease associations

773 The following terms from DisGeNet were used for each of the following broader disease annotations. For  
774 diabetes, we included all subtypes and diabetes-related phenotypes.

775 **CRC:** ‘Colorectal Carcinoma’, ‘Colorectal Neoplasms’, ‘Adenocarcinoma of large intestine’, ‘Malignant  
776 tumor of colon’, ‘Hereditary Nonpolyposis Colorectal Neoplasms’, ‘Hereditary non-polyposis colorectal  
777 cancer syndrome’, ‘Hereditary Nonpolyposis Colorectal Cancer’, ‘Colorectal cancer, hereditary  
778 nonpolyposis, type 1’, ‘Hereditary nonpolyposis colorectal carcinoma’, ‘Colon Carcinoma’, ‘Colorectal  
779 Cancer, Susceptibility to, 4’, ‘Colorectal Cancer, Susceptibility to, on Chromosome 15’, ‘Colorectal  
780 Cancer, Hereditary Nonpolyposis, type 7 (disorder)’, ‘Colorectal Cancer, Hereditary Nonpolyposis, type  
781 5’, ‘Colorectal Cancer, Hereditary Nonpolyposis, type 8’, ‘Colorectal Adenomatous Polyposis,  
782 Autosomal Recessive’, ‘Colorectal Cancer, Hereditary Nonpolyposis, type 4’, ‘Colorectal Cancer,  
783 Susceptibility to, 10’, ‘Colorectal Cancer, Susceptibility to, 12’, ‘Familial Colorectal Cancer Type X’,  
784 ‘Colorectal Cancer, Hereditary Nonpolyposis, type 6’, ‘Colorectal Cancer, Susceptibility to, 1’,  
785 ‘Oligodontia-Colorectal Cancer Syndrome’

786  
787 **Diabetes:** ‘Diabetes Mellitus, Experimental’, ‘Diabetic Nephropathy’, ‘Diabetes Mellitus, Non-Insulin-  
788 Dependent’, ‘Diabetes Mellitus, Insulin-Dependent’, ‘Diabetes, Autoimmune’, ‘Brittle diabetes’,  
789 ‘Diabetes Mellitus, Ketosis-Prone’, ‘Diabetes Mellitus, Sudden-Onset’, ‘Diabetic Retinopathy’, ‘Diabetic  
790 Cardiomyopathies’, ‘Diabetic cystopathy’, ‘Diabetes Mellitus’, ‘Complications of Diabetes Mellitus’,  
791 ‘Neonatal diabetes mellitus’, ‘Gestational Diabetes’, ‘Alloxan Diabetes’, ‘Streptozotocin Diabetes’,  
792 ‘Prediabetes syndrome’, ‘Diabetic Angiopathies’, ‘Microangiopathy, Diabetic’, ‘Diabetes Mellitus,  
793 Noninsulin-dependent, 1 (disorder)’, ‘Diabetic Neuropathies’, ‘Symmetric Diabetic Proximal Motor  
794 Neuropathy’, ‘Asymmetric Diabetic Proximal Motor Neuropathy’, ‘Diabetic Mononeuropathy’, ‘Diabetic  
795 Polyneuropathies’, ‘Diabetic Amyotrophy’, ‘Diabetic Autonomic Neuropathy’, ‘Diabetic Asymmetric  
796 Polyneuropathy’, ‘Diabetic Neuralgia’, ‘Nephrogenic Diabetes Insipidus’, ‘Diabetes Mellitus, Insulin-  
797 Dependent, 22 (disorder)’, ‘Microcephaly, Epilepsy, and Diabetes Syndrome’, ‘Diabetes’, ‘Diabetes  
798 Mellitus, Insulin-Dependent, 12’, ‘Microvascular Complications of Diabetes, Susceptibility to, 3  
799 (finding)’, ‘Diabetes Mellitus, Neonatal, with Congenital Hypothyroidism’, ‘Phosphate Diabetes’,  
800 ‘Diabetic encephalopathy’, ‘Microvascular Complications of Diabetes, Susceptibility to, 2 (finding)’,  
801 ‘Insulin-resistant diabetes mellitus’, ‘Lymphedema-Distichiasis Syndrome with Renal Disease and  
802 Diabetes Mellitus’, ‘Lipoatrophic Diabetes Mellitus’, ‘Pregnancy in Diabetics’, ‘Maturity onset diabetes  
803 mellitus in young’, ‘Maturity-Onset Diabetes of the Young, type 14’, ‘Latent Autoimmune Diabetes in  
804 Adults’, ‘Monogenic diabetes’, ‘Diabetes mellitus autosomal dominant type II (disorder)’, ‘Diabetes  
805 Mellitus, Permanent Neonatal’, ‘Diabetes Insipidus’, ‘Microvascular Complications of OF Diabetes,  
806 Susceptibility to, 7 (finding)’, ‘Renal cysts and diabetes syndrome’, ‘Maturity-Onset Diabetes of the  
807 Young, Type 1’, ‘Fanconi Renotubular Syndrome 4 with Maturity-onset Diabetes of the Young’,  
808 ‘Transient neonatal diabetes mellitus’, ‘Diabetes Mellitus, Transient Neonatal, 1’, ‘Diabetes Mellitus,  
809 Insulin-Dependent, 2’, ‘diabetes (mellitus) due to autoimmune process’, ‘Diabetes (mellitus) due to  
810 immune mediated pancreatic islet beta-cell destruction’, ‘Idiopathic Diabetes (Mellitus)’, ‘Microvascular  
811 Complications of Diabetes, Susceptibility to, 4 (finding)’, ‘Diabetes Mellitus, Insulin-Dependent, 10’,  
812 ‘Acquired Nephrogenic Diabetes Insipidus’, ‘Congenital Nephrogenic Diabetes Insipidus’, ‘Nephrogenic  
813 Diabetes Insipidus, Type I’, ‘Nephrogenic Diabetes Insipidus, Type II’, ‘ADH-Resistant Diabetes  
814 Insipidus’, ‘Diabetic Ketoacidosis’, ‘Non-insulin-dependent diabetes mellitus with unspecified  
815 complications’, ‘Diabetes Mellitus, Permanent Neonatal, with Neurologic Features’, ‘Developmental  
816 Delay, Epilepsy, and Neonatal Diabetes’, ‘Maturity-onset diabetes of the young, type 10’, ‘Diabetes  
817 Mellitus, Insulin-Resistant, with Acanthosis Nigricans’, ‘Maturity-onset Diabetes of the Young, type IV  
818 (disorder)’, ‘Diabetes Mellitus, Transient Neonatal, 3 (disorder)’, ‘Maturity-onset Diabetes of the Young,  
819 type 13’, ‘Diabetes Mellitus, Insulin-Dependent, 5’, ‘Diabetes Mellitus, Insulin-Dependent, 7’,

820 'Maturity-onset Diabetes of the Young, type 6 (disorder)', 'Gastroparesis with diabetes mellitus', 'Other  
821 specified diabetes mellitus with unspecified complications', 'Insulin-dependent diabetes mellitus  
822 secretory diarrhea syndrome', 'Severe nonproliferative diabetic retinopathy', 'Microvascular  
823 Complications of Diabetes, Susceptibility to, 5 (finding)', 'Central Diabetes Insipidus', 'Ataxia,  
824 Combined Cerebellar and Peripheral, with Hearing Loss and Diabetes Mellitus', 'Maturity-onset diabetes  
825 of the young, type 11', 'Microvascular Complications of Diabetes, Susceptibility to, 6 (finding)',  
826 'Diabetes Mellitus, Transient Neonatal, 2 (disorder)', 'Maturity-onset Diabetes of the Young, type 3  
827 (disorder)', 'Diabetes Mellitus, Insulin-Dependent, 20 (disorder)', 'Proliferative diabetic retinopathy',  
828 'Microvascular Complications of Diabetes, Susceptibility to, 1 (finding)', 'Maturity-onset Diabetes of the  
829 Young, type type 7 (disorder)', 'Diabetes Mellitus, Noninsulin-dependent, 5'

830  
831 **Autoimmune:** 'Autoimmune hemolytic anemia', 'Autoimmune Diseases', 'Autoimmune state', 'Celiac  
832 Disease', 'Lupus Erythematosus, Systemic', 'Diabetes, Autoimmune', 'Autoimmune Chronic Hepatitis',  
833 'Rheumatoid Arthritis', 'Ankylosing spondylitis', 'Multiple Sclerosis', 'Autoimmune  
834 Lymphoproliferative Syndrome', 'Experimental Autoimmune Encephalomyelitis', 'Lupus  
835 Erythematosus, Cutaneous', 'Chilblain lupus 1', 'Multiple Sclerosis, Acute Fulminating', 'Autoimmune  
836 thyroiditis', 'Autoimmune Lymphoproliferative Syndrome Type 2B', 'Autoimmune Interstitial Lung,  
837 Joint, and Kidney Disease', 'Lupus Vulgaris', 'Lupus Erythematosus, Discoid', 'Lupus Erythematosus',  
838 'Rheumatoid Arthritis, Systemic Juvenile', 'Neuritis, Autoimmune, Experimental', Systemic Lupus  
839 Erythematosus 16', 'Ankylosing spondylitis and other inflammatory spondylopathies', 'Lupus Vasculitis,  
840 Central Nervous System', 'Lupus Meningoencephalitis', 'Neuropsychiatric Systemic Lupus  
841 Erythematosus', 'Lupus Nephritis', 'Vitiligo-associated Multiple Autoimmune Disease Susceptibility 1  
842 (finding)', Chilblain Lupus 2', 'Latent Autoimmune Diabetes in Adults', 'Vitiligo-associated Multiple  
843 Autoimmune Disease Susceptibility 6', 'Autoimmune Disease, Susceptibility to, 1', 'Autoimmune  
844 Hepatitis with Centrilobular Necrosis', 'Polyendocrinopathies, Autoimmune', 'Polyglandular Type I  
845 Autoimmune Syndrome', 'Autoimmune Syndrome Type II, Polyglandular', 'Polyglandular Type III  
846 Autoimmune Syndrome', 'Autoimmune Polyendocrinopathy Syndrome, Type I, Autosomal Dominant',  
847 'Autoimmune Polyendocrinopathy Syndrome, type I, with Reversible Metaphyseal Dysplasia',  
848 'Autoimmune polyendocrinopathy syndrome, type 1', 'Multiple Sclerosis, Acute Relapsing', 'Multiple  
849 Sclerosis, Relapsing-Remitting', 'diabetes (mellitus) due to autoimmune process', 'Autoimmune  
850 Lymphoproliferative Syndrome, Type IA', 'Ras-associated Autoimmune Leukoproliferative Disorder',  
851 'Autoimmune Lymphoproliferative Syndrome Type 1, Autosomal Dominant', 'Autoimmune Diseases of  
852 the Nervous System', 'Autoimmune Disease, Susceptibility to, 6', 'Autoimmune Lymphoproliferative  
853 Syndrome, Type III', 'Alpha/Beta T-cell Lymphopenia with Gama/Delta T-cell Expansion, Severe  
854 Cytomegalovirus Infection, and Autoimmunity', 'Idiopathic Autoimmune Hemolytic Anemia',  
855 'Autoimmune Disease, Multisystem, Infantile-onset, 1', 'Systemic Lupus Erythematosus, Multisystem,  
856 11', 'T-cell Immunodeficiency, Recurrent Infections, and Autoimmunity with or without Cardiac  
857 Malformations', 'T-cell Immunodeficiency, Recurrent Infections, Autoimmunity, and Cardiac  
858 Malformations', 'Hyperthyroidism, Nonautoimmune', 'Autoimmune Disease, Multisystem, Infantile-  
859 onset, 2', 'Autoimmune Disease, Multisystem, with facial dysmorphism', 'Syndromic multisystem  
860 autoimmune disease due to itch deficiency', 'Autoimmune Lymphoproliferative Syndrome, Type IIA',  
861 'Immunodeficiency, Common Variable, 8 with Autoimmunity'

862  
863 **Obesity:** 'Obesity', 'Pediatric Obesity', 'Adolescent Obesity', 'Childhood Overweight', 'Infantile  
864 Obesity', 'Infant Overweight', 'Adolescent Overweight', 'Abdominal obesity metabolic syndrome',  
865 'Obesity, Morbid', 'Obesity, Hyperphagia, and Developmental Delay', 'Obesity, Abdominal', 'Mental  
866 Retardation, Epileptic Seizures, Hypogonadism and Hypogenitalism, Microcephaly, and Obesity  
867 (disorder)', 'Obesity, Susceptibility to', 'Obesity, Visceral', 'Overweight', 'Obesity due to melanocortin 4  
868 receptor deficiency', 'ABDOMINAL Obesity-Metabolic Syndrome 1', 'Developmental Delay,  
869 Intellectual Disability, Obesity, and Feautres', 'Spastic Paraplegia, Intellectual disability, nystagmus, and

870 Obesity', 'Retinal Dystrophy and Obesity', 'Childhood-onset truncal obesity', 'Morbid Obesity and  
871 Spermatogenic Failure', 'Abdominal Obesity-Metabolic Syndrome 3'

872

873 **IBD:** 'Ulcerative Colitis', 'Crohn Disease', 'Colitis', "Crohn's disease of large bowel", 'Inflammatory  
874 Bowel Diseases', 'Necrotizing Enterocolitis', "Crohn's disease of the ileum", 'Ileocolitis', 'Inflammatory  
875 Bowel Disease 17', 'Chronic left-sided ulcerative colitis', 'Inflammatory Bowel Disease 12',  
876 'Inflammatory Bowel Disease 19', 'Enterocolitis', 'Enterocolitis, Neutropenic', 'Inflammatory bowel  
877 disease 28, Autosomal Recessive', 'Inflammatory bowel disease 25, autosomal recessive', 'Inflammatory  
878 Bowel Disease 14', 'Inflammatory Bowel Disease 13', 'Inflammatory Bowel Disease 10', 'Inflammatory  
879 Bowel Disease 29', 'Autoinflammation with Infantile Enterocolitis', 'Crohn Disease-associated Growth  
880 Failure, Susceptibility to (finding)', 'Neutropenic colitis', 'Inflammatory Bowel Disease,  
881 Immunodeficiency, and encephalopathy', 'Inflammatory Bowel Disease, Immunodeficiency, and  
882 Ecnephalopathy', 'Inflammatory Bowel Disease 16'

883

884



## 885 **Supplementary Figures**

886

### 887 **Figure S1. Few bacterial-human interaction sequences populate the Protein Data Bank.**

888 A Venn diagram describing the number of detected bacterial clusters and human interactors in the nine  
889 metagenomic cohorts that have any matching structure (using BLASTp) in the PDB to at least one chain  
890 (medium blue) and whether their homologous structures appear on the same PDB cocrystal structure  
891 (dark blue). Only one PDB structure showed non-overlapping homology to both a human and bacterial  
892 protein.

893

### 894 **Figure S2. An outline of our homology mapping procedure and alignment.**

895 Depiction of the interaction network inference and protein detection pipeline for bacterial/microbiome  
896 (blue)-human (orange) PPIs.

897

### 898 **Figure S3. Interface similarity between bacterial proteins within a UniRef cluster.**

899 Similarity, identity, and Jensen-Shannon divergence of interface residues across all bacterial members of  
900 the same UniRef cluster sourced from all cocrystal structures in the PDB with human and bacterial  
901 interactors.

902

### 903 **Figure S4. Disease-associated interactions are enriched for those based on affinity-based methods.**

904 The three largest categories of detection methods are shown (affinity-based methods, yeast-2-hybrid,  
905 mass spectrometry methods) as well as ‘Other’. p-values are only shown between ‘Detected’ and  
906 ‘Disease-associated’ and are depicted by: \* p<0.05; \*\* p<0.01; \*\*\* p<0.001; \*\*\*\* p<0.0001 (Chi-square  
907 test). Total numbers of each set are noted in the legend.

908

### 909 **Figure S5. Degree distribution for bacterial protein clusters and human proteins.**

910 The degree distribution per bacterial protein cluster (left) or human protein (right) in the HBNNet, Detected  
911 or Disease-associated subsets.

912

### 913 **Figure S6. Performance metrics of the random forest (RF) classifier.**

914 (A) A heatmap of area under the receiver operating characteristic curve (AUROC), precision, recall, and  
915 F1-scores for random forests on the putative human interactors with the microbiomes of each  
916 metagenomic study with grid search-based hyper-parameter tuning, evaluated using five-fold cross  
917 validation. (B) Performance metrics of the RF classifier using only features above the 90<sup>th</sup> percentile.

918

### 919 **Figure S7. Gene-disease annotations are specific to each disease cohort.**

920 (A) The proportions of human proteins implicated in disease, according to their GDAs in DisGeNET  
921 (only GDAs with scores over 0.1 were considered) and grouped according to disease-specific cohorts, in  
922 the following subsets: all reviewed human proteins (totaling 20,371 proteins); HBNNet (5,770 proteins);  
923 human interactors with detected bacterial proteins (2,279 proteins); and those human interactors with  
924 feature importances above the 90<sup>th</sup> percentile in their respective cohorts (648 unique proteins). p-values  
925 are depicted by: \* p<0.05; \*\* p<0.01; \*\*\* p<0.001; \*\*\*\* p<0.0001 (Chi-square test). Total numbers of  
926 each set are noted in the legend.

927

### 928 **Figure S8. Protein localization and protein expression according to human tissue.**

929 Protein localization according to tissue, as annotated by the Human Protein Atlas. Only those with  
930 “enhanced”, “supported” or “approved” annotations were included. Total numbers of each set are noted in  
931 the legend.

932

### 933 **Figure S9. Secretion systems distribution varies across bacterial species.**

934 A heatmap (present/absent) of the required components for each secretion system (denoted using their KO  
935 numbers) present in each bacterial species (colored by phylum to the left) with at least one detected

936 protein associated with bacterial protein clusters in nine case-control cohort studies. The actual number of  
937 detected and disease-associated protein cluster representatives for each bacteria in any of the nine  
938 metagenomic studies is plotted to the right.

939

940 **Figure S10. Bacterial clusters gain putative human-relevant functions.**

941 Human pathways (annotated using WikiPathways) significantly enriched (FDR-adjusted p-values < 0.05)  
942 in either HBNet, the human proteins targeted by bacterial clusters detected in the metagenomic studies, or  
943 those human targets associated with disease in the metagenomic case-control cohort studies (disease-  
944 associated). 953 out of 1,102 metagenomic cohort-associated human proteins were able to be annotated.  
945 Note that each bacterial protein cluster may gain multiple annotations, according to the roles of their  
946 human interactor(s).

947

948 **Figure S11. Cocrystal structure of blood coagulation factor Xa in complex with Ecotin M84R.**

949 Cluster Uniref50\_Q1R9K8 contains several bacterial ecotins detected in human metagenomes. Using  
950 BLAST, we found high-quality matches between members of this cluster and the structure 1p0s:E (Ecotin  
951 precursor M84R) in the PDB (identity of 97.2%, eval= $10^{-75}$ ). Our putative interactor to this cluster,  
952 coagulation factor X (P00742) likewise matched structure 1p0s:H (coagulation factor X precursor)  
953 (identity of 100%, eval= $3.8 \times 10^{-150}$ ). Chain E is shown in blue, and chain H in orange, with their interface  
954 residues highlighted as spheres. The linear model of both proteins is shown underneath. The linear  
955 model's colored areas indicate the part of the proteins that were crystallized in this PDB, while the  
956 greyed-out areas indicate non-crystallized spans. The squares indicate the range of the BLAST match  
957 between our query proteins and the PDB reference sequences. Finally, ticks on the linear model indicate  
958 the location of interface residues as detected in this model. There are currently not enough published  
959 structures to perform this analysis on all interactions involving detected bacterial genes (Fig. S2, Table  
960 S7).

961

962

963 **Supplementary Tables**

964 **Table S1. Extended information on known experimentally verified host-microbiome interactions**  
965 **with evidence for a role in cellular physiology and/or human health.**

966 Information on the interaction detection method for human-microbiome PPIs that have been shown to  
967 affect cell physiology and/or human health.

968

969 **Table S2. Metagenomic samples used in this research.**

970 For each study, we list the sample numbers and labels in the cohort study.

971

972 **Table S3. Disease-associated human-microbiome PPIs.**

973 Human-microbiome PPIs are listed according to their UniProt and UniRef50 identifiers, human and  
974 bacterial protein names.

975

976 **Table S4. Number of human interactors according to the source of the experimentally-verified**  
977 **interactors.**

978 The number of human interactors, according to the species sourcing the initial experimentally verified  
979 interacting protein.

980

981 **Table S5. Human interactors that are known drug targets.**

982 For each disease-associated human protein, we list the drug interactor (annotated using DrugCentral and  
983 DrugBank) and the study in which it was found to be important.

984

985 **Table S6. Extended information for bacterial proteins targeting known drug targets in Figure 4.**

986 Bacterial clusters depicted in Fig. 4 are listed with their UniRef number and detected taxa, according to  
987 HUMANN3.

988

989 **Table S7. Cocrystal structures representing interactions in our dataset.**

990 All pairs of detected bacterial proteins and human proteins in the nine metagenomic datasets that have  
991 BLASTp matches to two different chains within the same PDB cocrystal structure (totaling 8 bacterial  
992 protein clusters and 10 human proteins). This list includes structures with at least one chain exclusive to  
993 each bacterial and human proteins.

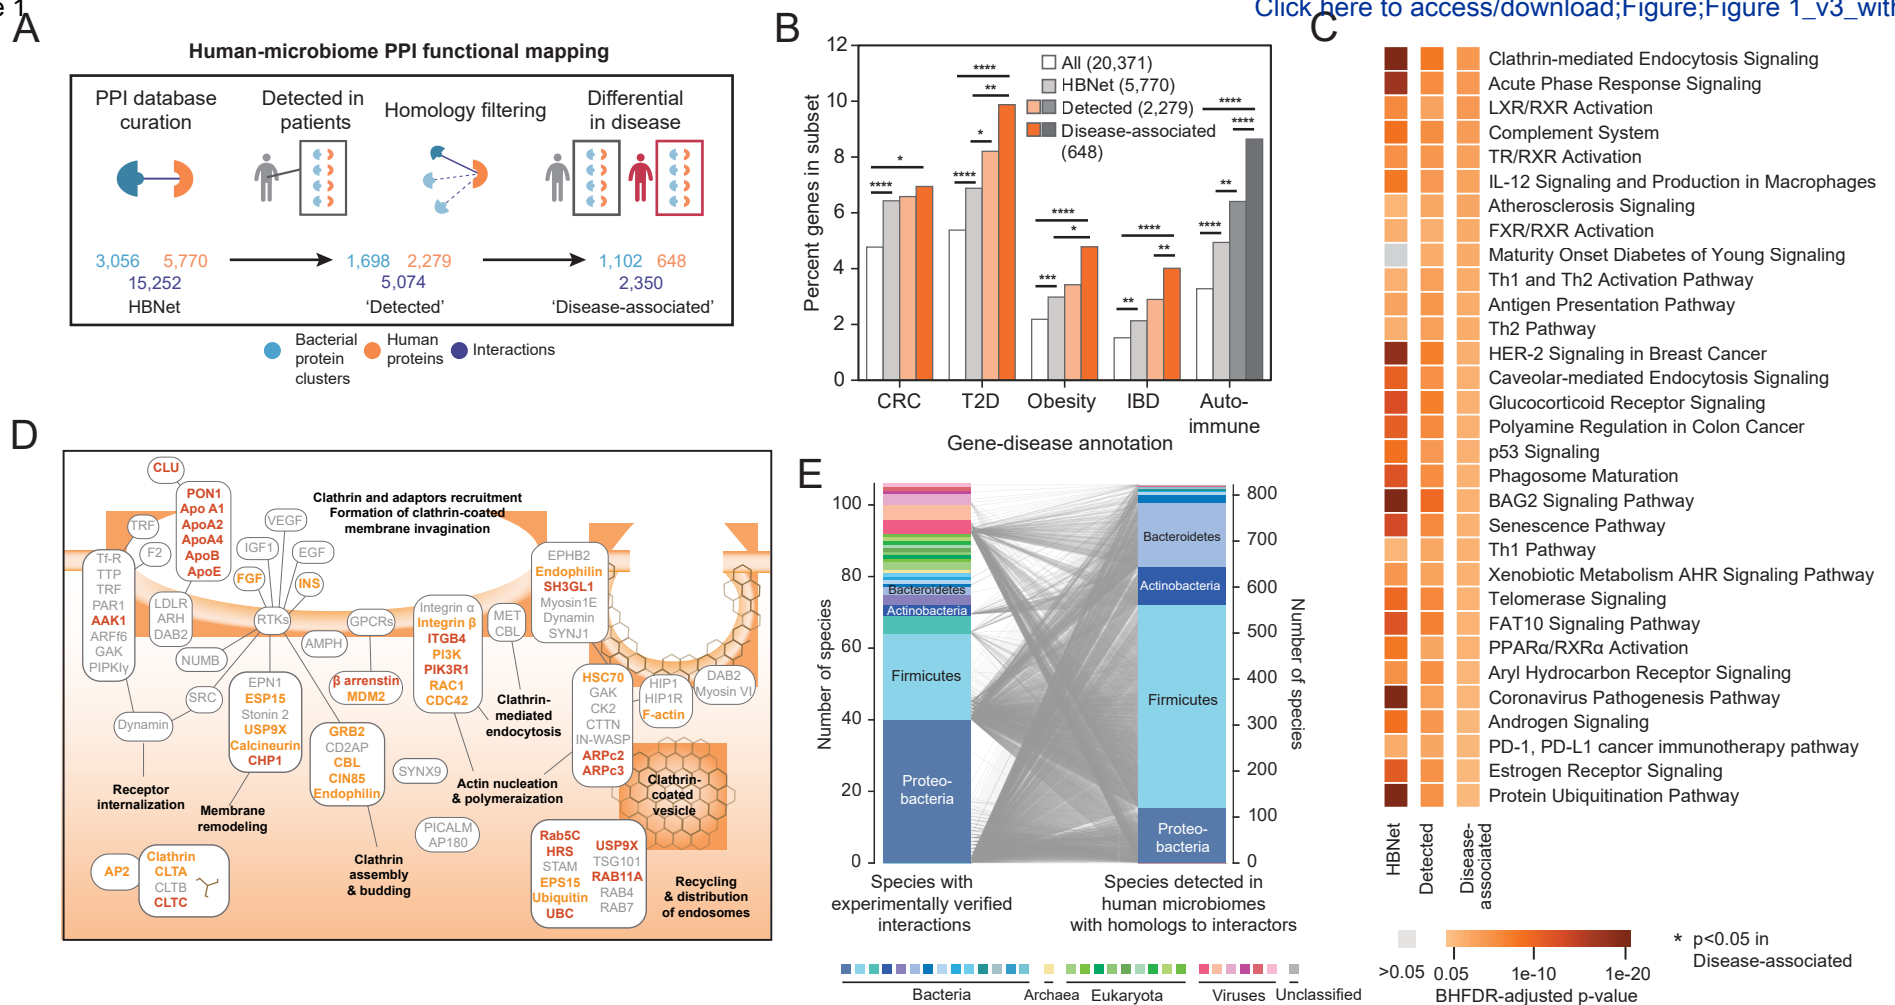

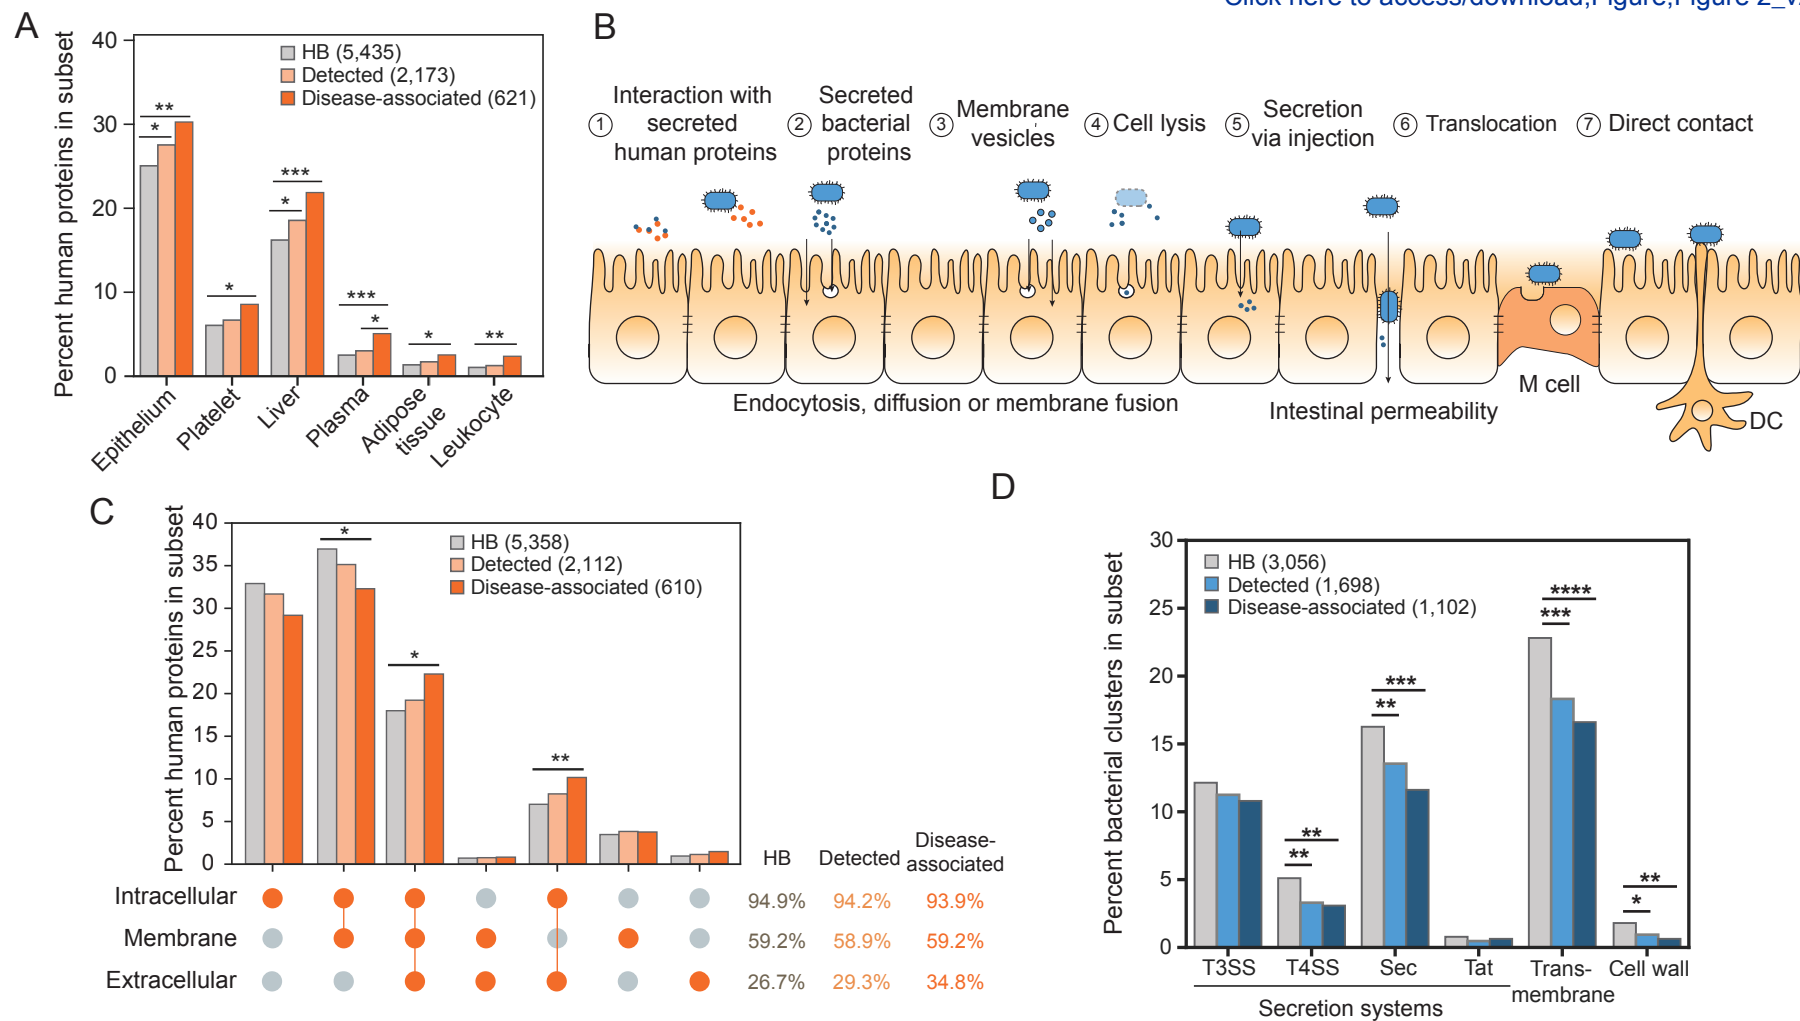

**Figure 2. Bacterial proteins gain access to human proteins through a variety of mechanisms.**

**(A)** Proportions of human proteins in the HBNet, Detected and Disease-associated subsets are plotted according to their enrichments in tissues and fluids, as annotated using DAVID. Only those with significant enrichment between any two subsets are shown. p-values for enrichments are depicted by: \*  $p < 0.05$ ; \*\*  $p < 0.01$ ; \*\*\*  $p < 0.001$ ; \*\*\*\*  $p < 0.0001$  (EASE Score provided by DAVID, a modified Fisher Exact P-value; FDR-adjusted). Total numbers of each set are noted in the legend. **(B)** A schematic depicting potential opportunities for bacterial proteins to access human proteins. Interactions may involve: (1) secreted human proteins, (2) bacterial proteins secreted into the extracellular space; (3) membrane vesicles that are endocytosed or can fuse with human cell membranes; (4) bacterial cellular lysate; (5) proteins injected into human cells by T3SS, T4SS and T6SS, (6) cells and their products that translocate as a result of barrier dysfunction or “leaky gut”, and/or (7) direct contact with M cells, dendritic cells (DC), or epithelial cells. **(C)** Proportions of human proteins in the HBNet, Detected and Disease-associated subsets, are plotted according to their subcellular locations, as annotated using Gene Ontology Cellular Component, is depicted. p-values for enrichments are depicted by: \*  $p < 0.05$ ; \*\*  $p < 0.01$ ; \*\*\*  $p < 0.001$ ; \*\*\*\*  $p < 0.0001$  (Chi-square test). Total percentages for these subsets is listed at right, along with p-values. Total numbers of each set are noted in the legend. **(D)** Proportions of bacterial gene clusters in the HBNet, Detected and Disease-associated subsets are plotted according to their transmembrane and secretion predictions, annotated using TMHMM, EffectiveDB and SignalP. p-values for enrichments are depicted by: \*  $p < 0.05$ ; \*\*  $p < 0.01$ ; \*\*\*  $p < 0.001$ ; \*\*\*\*  $p < 0.0001$  (Chi-square test). Total numbers of each set are noted in the legend.



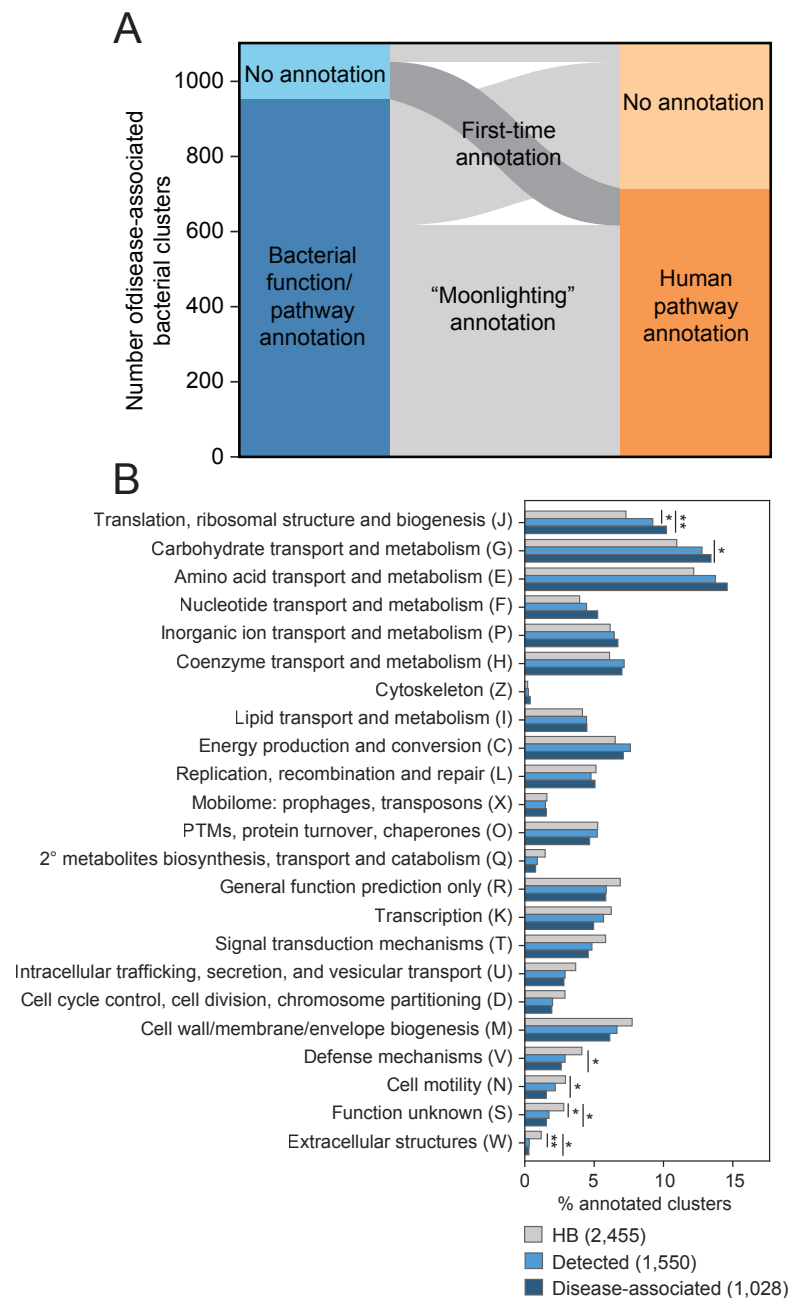

**Figure 3. Human pathway annotation can be propagated through interactors to improve bacterial pathway annotation.** (A) Paired stacked bar plots showing the 1,102 disease-associated bacterial protein clusters according to whether they are able to be annotated by KEGG (left) and their inferred pathways according to the human proteins they target (right), as annotated by WikiPathways. (B) Proportions of the bacterial clusters in the HBNet, Detected and Disease-associated subsets according to their COG functional categories are plotted. p-values are depicted by: \* p<0.05; \*\* p<0.01; \*\*\* p<0.001; \*\*\*\* p<0.0001 (Chi-square test). Total numbers of each set are noted in the legend.

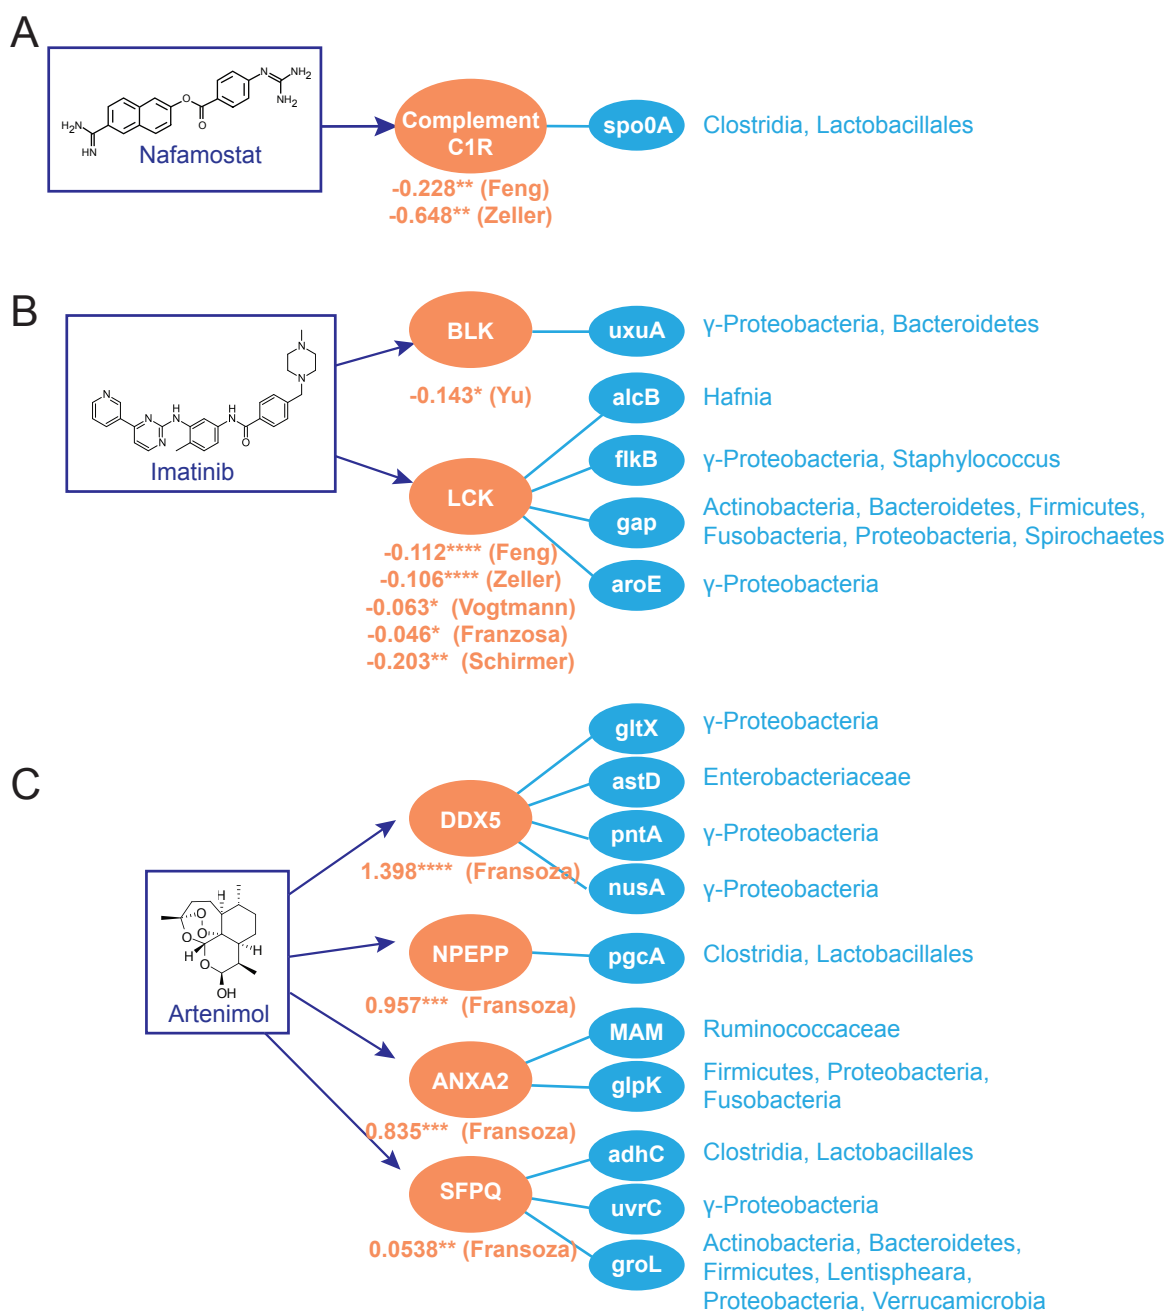

**Figure 4. Human proteins targeted by gut commensal proteins include known therapeutic drug targets.** (A) Nafamostat, (B) imatinib and (C) artemimol target human proteins that are differentially targeted by bacterial proteins detected in the stated metagenomic studies. Log<sub>10</sub> relative mean summed abundances of bacterial interactors in patients versus controls are provided. p-values were calculated by the Mann-Whitney rank-sum test, \* p<0.05; \*\* p<0.01; \*\*\* p<10<sup>-3</sup>; \*\*\*\* p<10<sup>-4</sup>). Full taxa and UniRef numbers for all bacterial proteins shown are provided in Table S6.

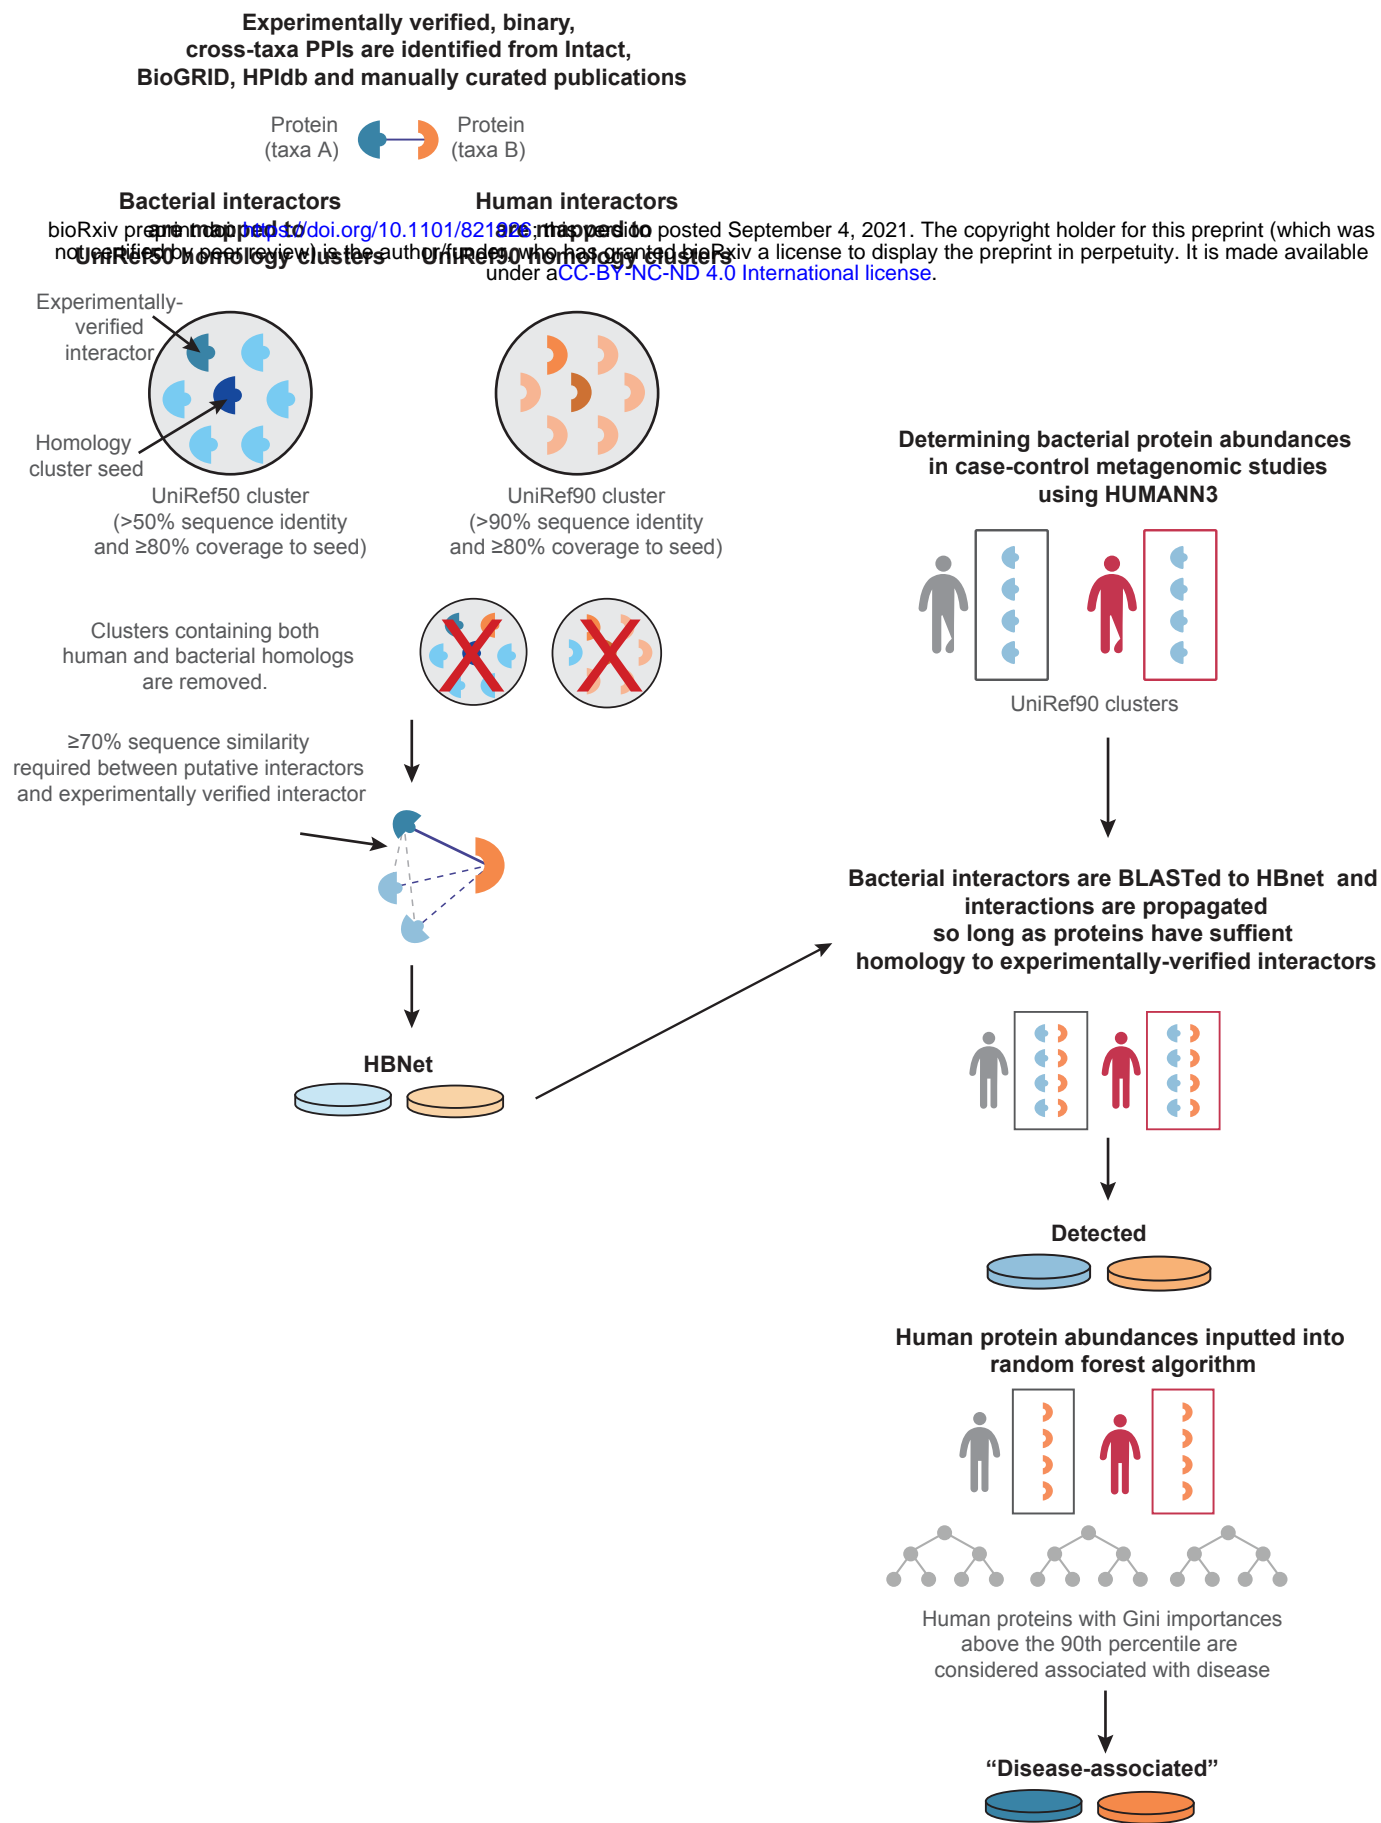

**Figure S1. An outline of our homology mapping procedure and alignment.**

Depiction of the interaction network inference and protein detection pipeline for bacterial/microbiome (blue)-human (orange) PPIs.

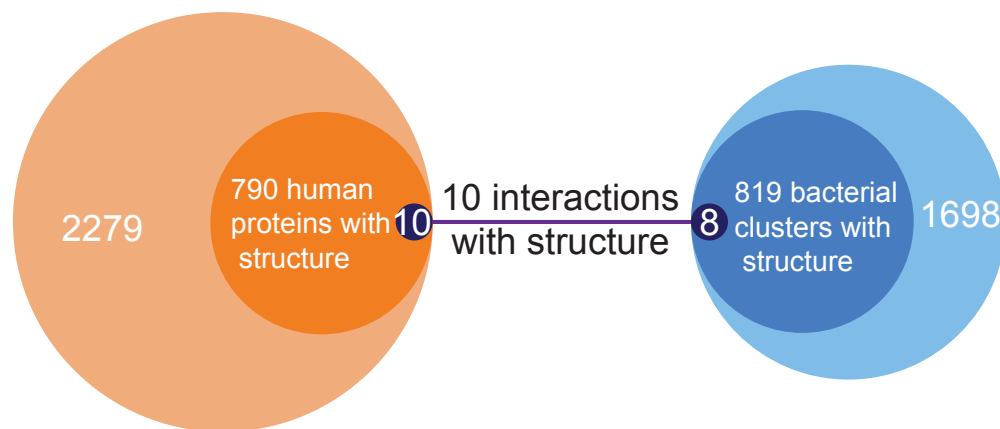

**Figure S2. Few bacterial-human interaction sequences populate the Protein Data Bank.**

A Venn diagram describing the number of detected bacterial clusters and human interactors in the nine metagenomic cohorts that have any matching structure (using BLASTp) in the PDB to at least one chain (medium blue) and whether their homologous structures appear on the same PDB cocrystal structure (dark blue). Only one PDB structure showed non-overlapping homology to both a human and bacterial protein.

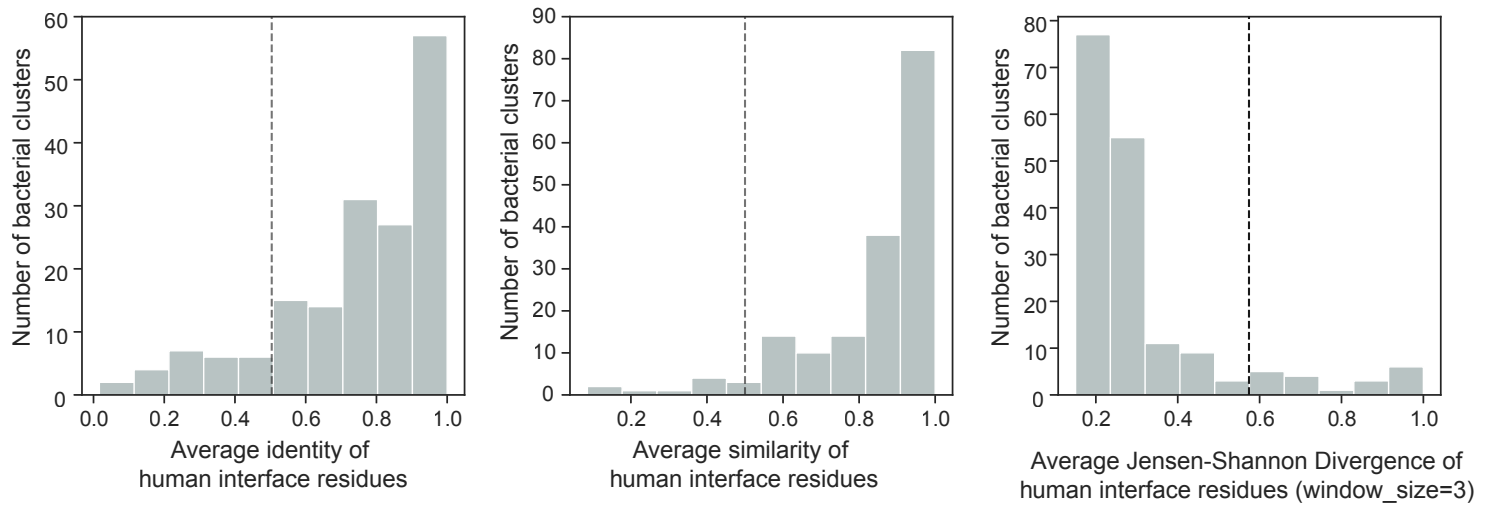

**Figure S3. Interface similarity between bacterial proteins within a UniRef cluster.** Similarity, identity, and Jensen-Shannon divergence of interface residues across all bacterial members of the same UniRef cluster sourced from all cocrystal structures in the PDB with human and bacterial interactors.



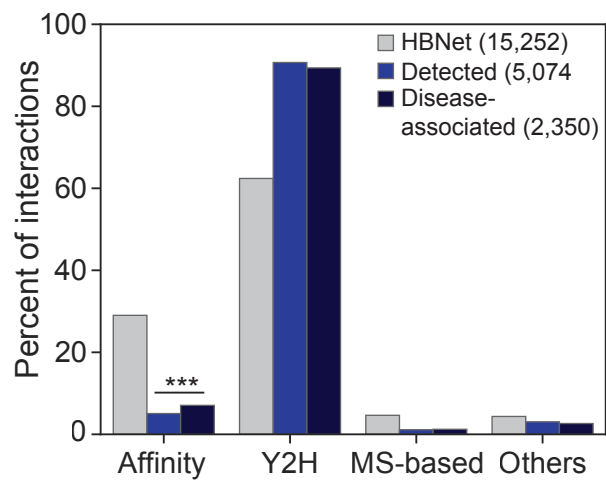

**Figure S4. Disease-associated interactions are enriched for those based on affinity-based methods.**

The three largest categories of detection methods are shown (affinity-based methods, yeast-2-hybrid, mass spectrometry methods) as well as 'Other'. p-values are only shown between 'Detected' and 'Disease-associated' and are depicted by: \*  $p < 0.05$ ; \*\*  $p < 0.01$ ; \*\*\*  $p < 0.001$ ; \*\*\*\*  $p < 0.0001$  (Chi-square test). Total numbers of each set are noted in the legend.

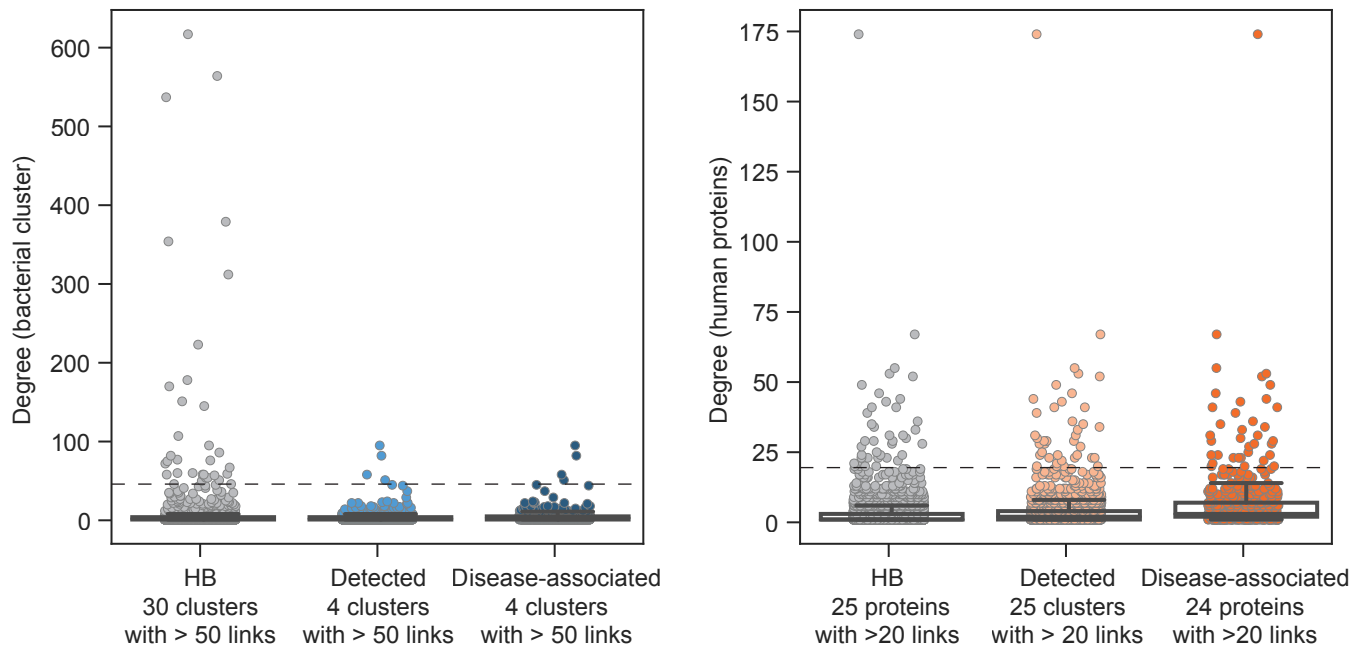

**Figure S5. Degree distribution for bacterial protein clusters and human proteins.**

The degree distribution per bacterial protein cluster (left) or human protein (right) in the HBNet, Detected or Disease-associated subsets.

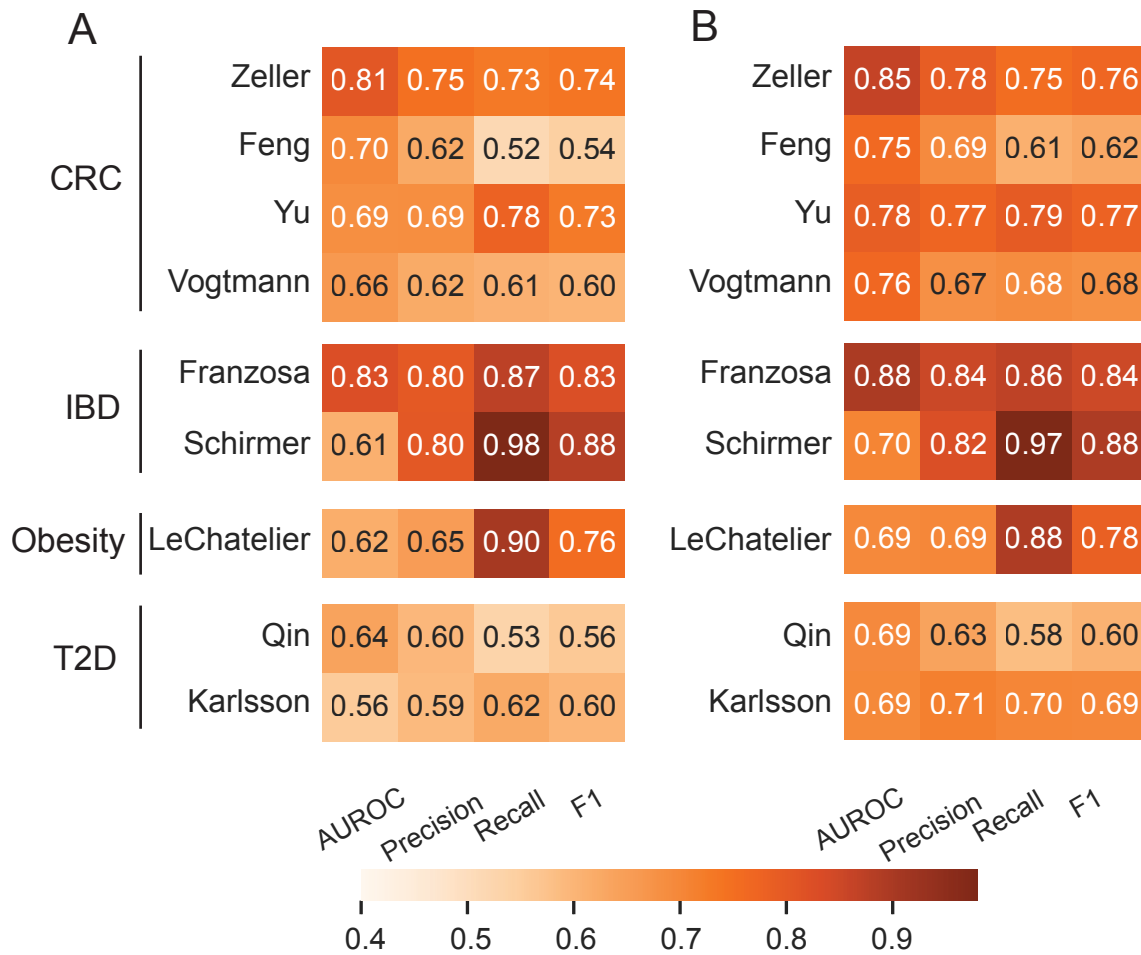

**Figure S6. Performance metrics of the random forest (RF) classifier.**

(A) A heatmap of area under the receiver operating characteristic curve (AUROC), precision, recall, and F1-scores for random forests on the putative human interactors with the microbiomes of each metagenomic study with grid search-based hyper-parameter tuning, evaluated using five-fold cross validation. (B) Performance metrics of the RF classifier using only features above the 90th percentile.

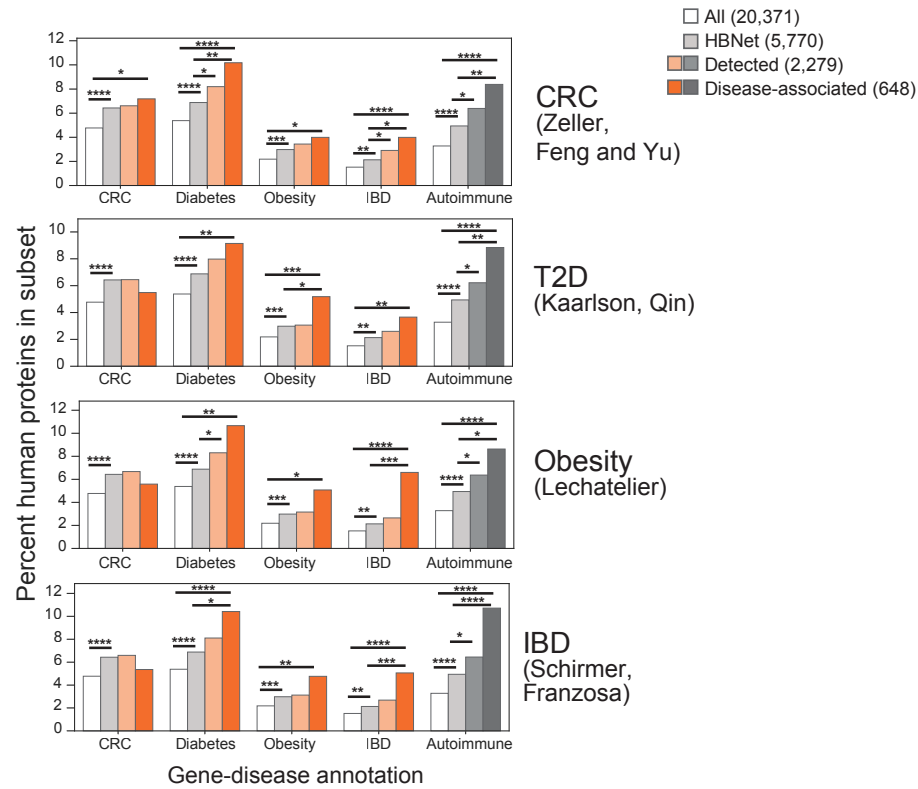

**Figure S7. Gene-disease annotations are specific to each disease cohort.** The proportions of human proteins implicated in disease, according to their GDAs in DisGeNET (only GDAs with scores over 0.1 were considered) and grouped according to disease-specific cohorts, in the following subsets: all reviewed human proteins (totaling 20,371 proteins); HBNet (5,770 proteins); human interactors with detected bacterial proteins (2,279 proteins); and those human interactors with feature importances above the 90th percentile in their respective cohorts (648 unique proteins). p-values are depicted by: \* p<0.05; \*\* p<0.01; \*\*\* p<0.001; \*\*\*\* p<0.0001 (Chi-square test). Total numbers of each set are noted in the legend.

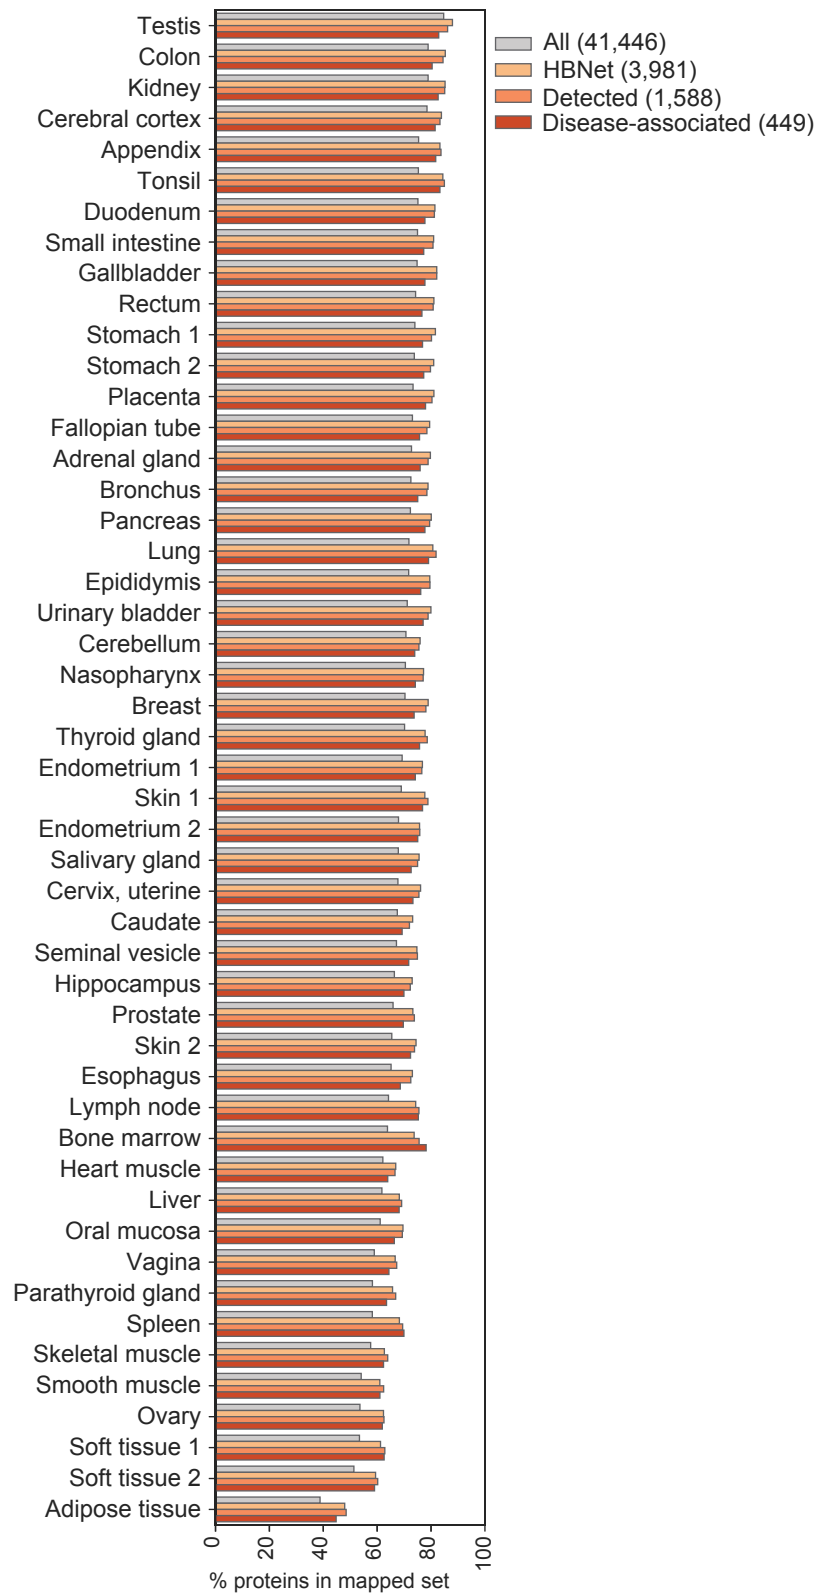

**Figure S8. Protein localization and protein expression according to human tissue.**

Protein localization according to tissue, as annotated by the Human Protein Atlas. Only those with “enhanced”, “supported” or “approved” annotations were included. Total numbers of each set are noted in the legend.



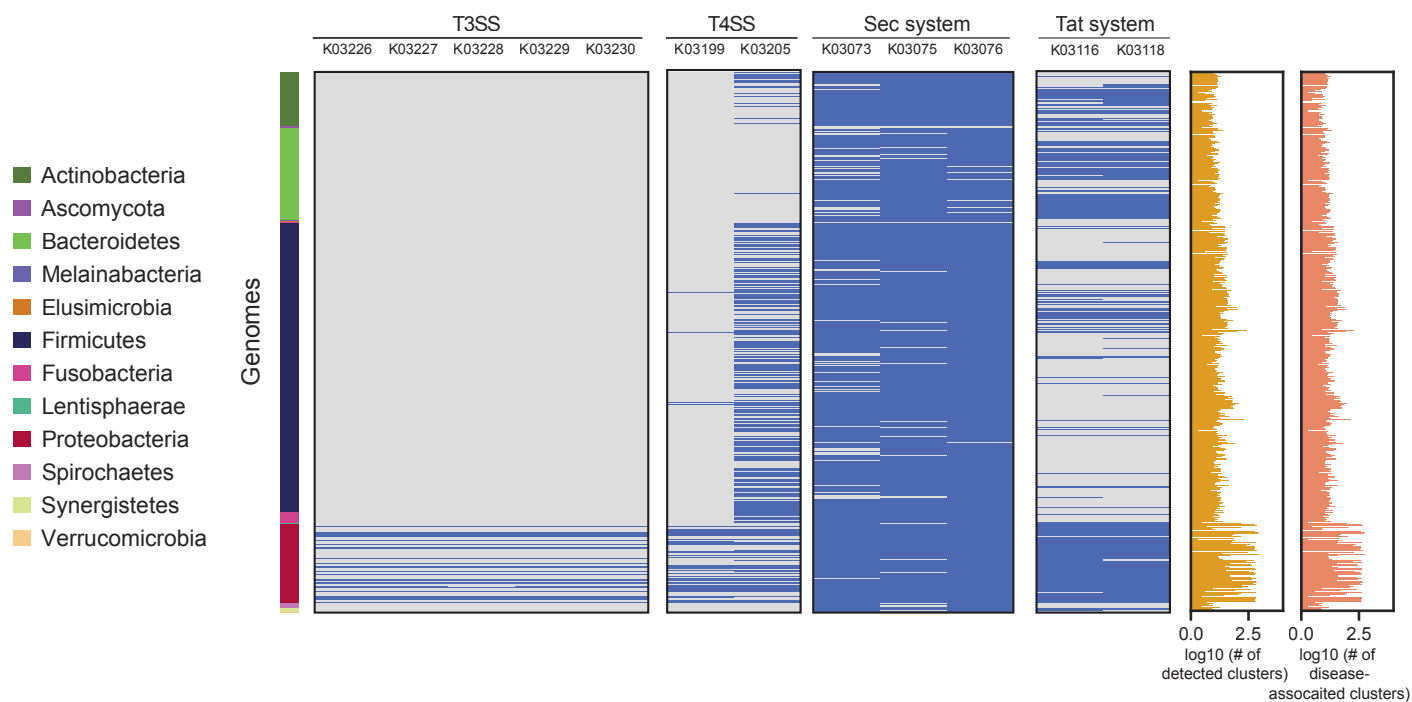

**Figure S9. Secretion systems distribution varies across bacterial species.**

A heatmap (present/absent) of the required components for each secretion system (denoted using their KO numbers) present in each bacterial species (colored by phylum to the left) with at least one detected protein associated with bacterial protein clusters in nine case-control cohort studies. The actual number of detected and disease-associated protein cluster representatives for each bacteria in any of the nine metagenomic studies is plotted to the right.

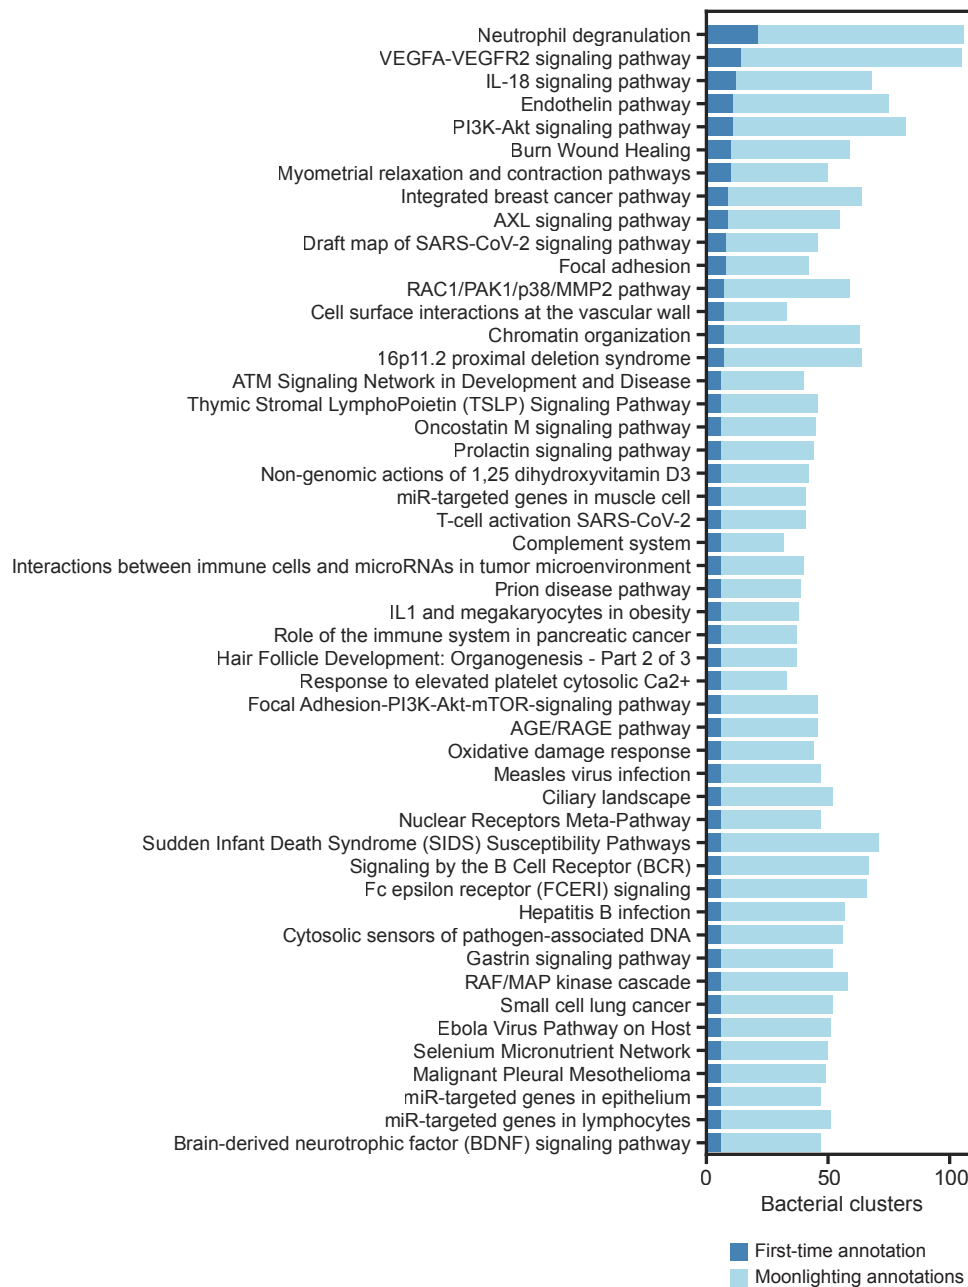

**Figure S10. Bacterial clusters gain putative human-relevant functions.**

Human pathways (annotated using WikiPathways) significantly enriched (FDR-adjusted p-values < 0.05) in either HBNet, the human proteins targeted by bacterial clusters detected in the metagenomic studies, or those human targets associated with disease in the metagenomic case-control cohort studies (disease-associated). 953 out of 1,102 metagenomic cohort-associated human proteins were able to be annotated. Note that each bacterial protein cluster may gain multiple annotations, according to the roles of their human interactor(s).

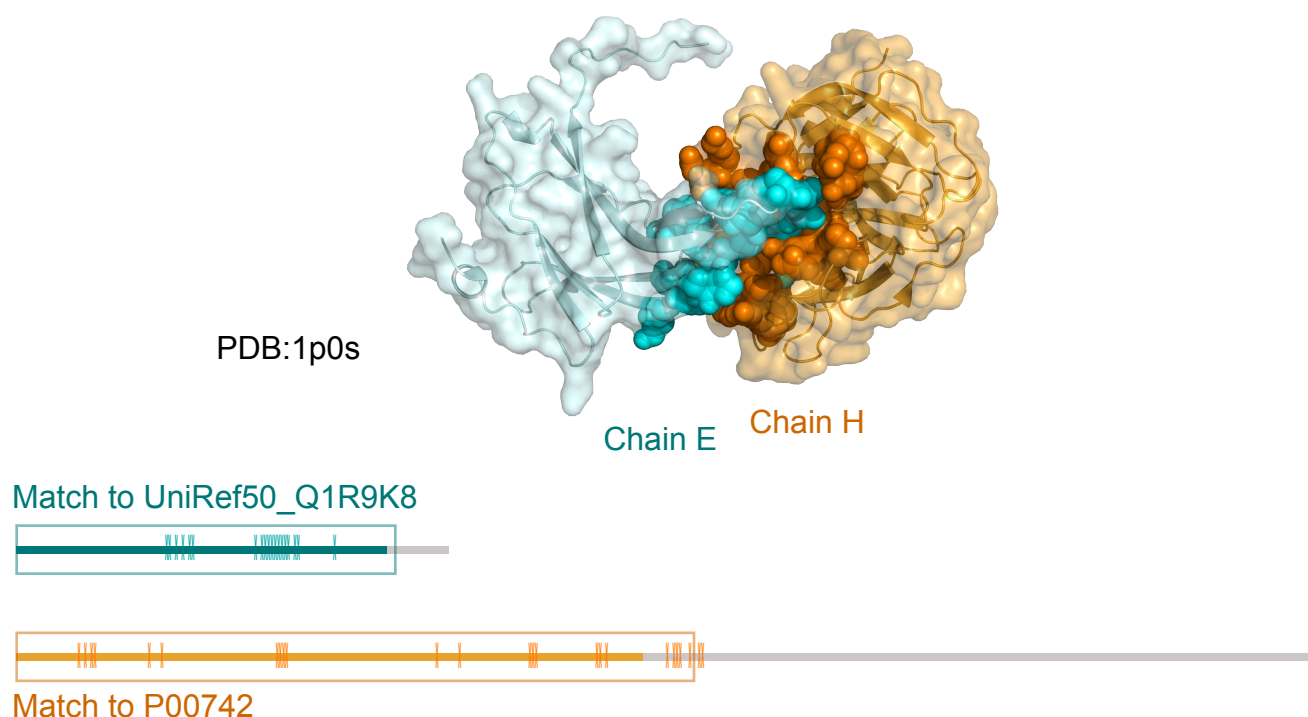

**Figure S11. Cocrystal structure of blood coagulation factor Xa in complex with Ecotin M84R.**

Cluster Uniref50\_Q1R9K8 contains several bacterial ecotins detected in human metagenomes. Using BLAST, we found high-quality matches between members of this cluster and the structure 1p0s:E (Ecotin precursor M84R) in the PDB (identity of 97.2%,  $\text{eval}=10^{-75}$ ). Our putative interactor to this cluster, coagulation factor X (P00742) likewise matched structure 1p0s:H (coagulation factor X precursor) (identity of 100%,  $\text{eval}=3.8 \times 10^{-150}$ ). Chain E is shown in blue, and chain H in orange, with their interface residues highlighted as spheres. The linear model of both proteins is shown underneath. The linear model's colored areas indicate the part of the proteins that were crystallized in this PDB, while the greyed-out areas indicate non-crystallized spans. The squares indicate the range of the BLAST match between our query proteins and the PDB reference sequences. Finally, ticks on the linear model indicate the location of interface residues as detected in this model. There are currently not enough published structures to perform this analysis on all interactions involving detected bacterial genes (Fig. S2, Table S6).
